# Supplementary material for: Seasonal dynamics of typhoid and paratyphoid fever
Source: PubMed Central journal article supplement (PMC5932015; doi:10.1038/s41598-018-25234-w), 2018-05-02
Supplement: 41598_2018_25234_MOESM1_ESM.pdf [file 41598_2018_25234_MOESM1_ESM.pdf]

# Seasonal dynamics of typhoid and paratyphoid fever

## Supplementary Figures and Tables

Neil J. Saad<sup>1\*</sup>, Victoria D. Lynch<sup>1</sup>, Marina Antillon<sup>1</sup>, Chongguang Yang<sup>1</sup>, John A. Crump<sup>2</sup>,

Virginia E. Pitzer<sup>1\*</sup>

<sup>1</sup>Department of Epidemiology of Microbial Diseases, Yale School of Public Health, Yale University, New Haven, Connecticut, United States of America

<sup>2</sup>Centre for International Health, University of Otago, Dunedin, New Zealand.

\*Corresponding authors

\*Corresponding author contact information:

Neil J. Saad or Virginia E. Pitzer

Department of Epidemiology of Microbial Diseases

Yale School of Public Health, Yale University

60 College St, New Haven, CT, USA

Email: [neil.saad@yale.edu](mailto:neil.saad@yale.edu) or [virginia.pitzer@yale.edu](mailto:virginia.pitzer@yale.edu)

**Supplementary Figure 1. Flow chart of studies.**

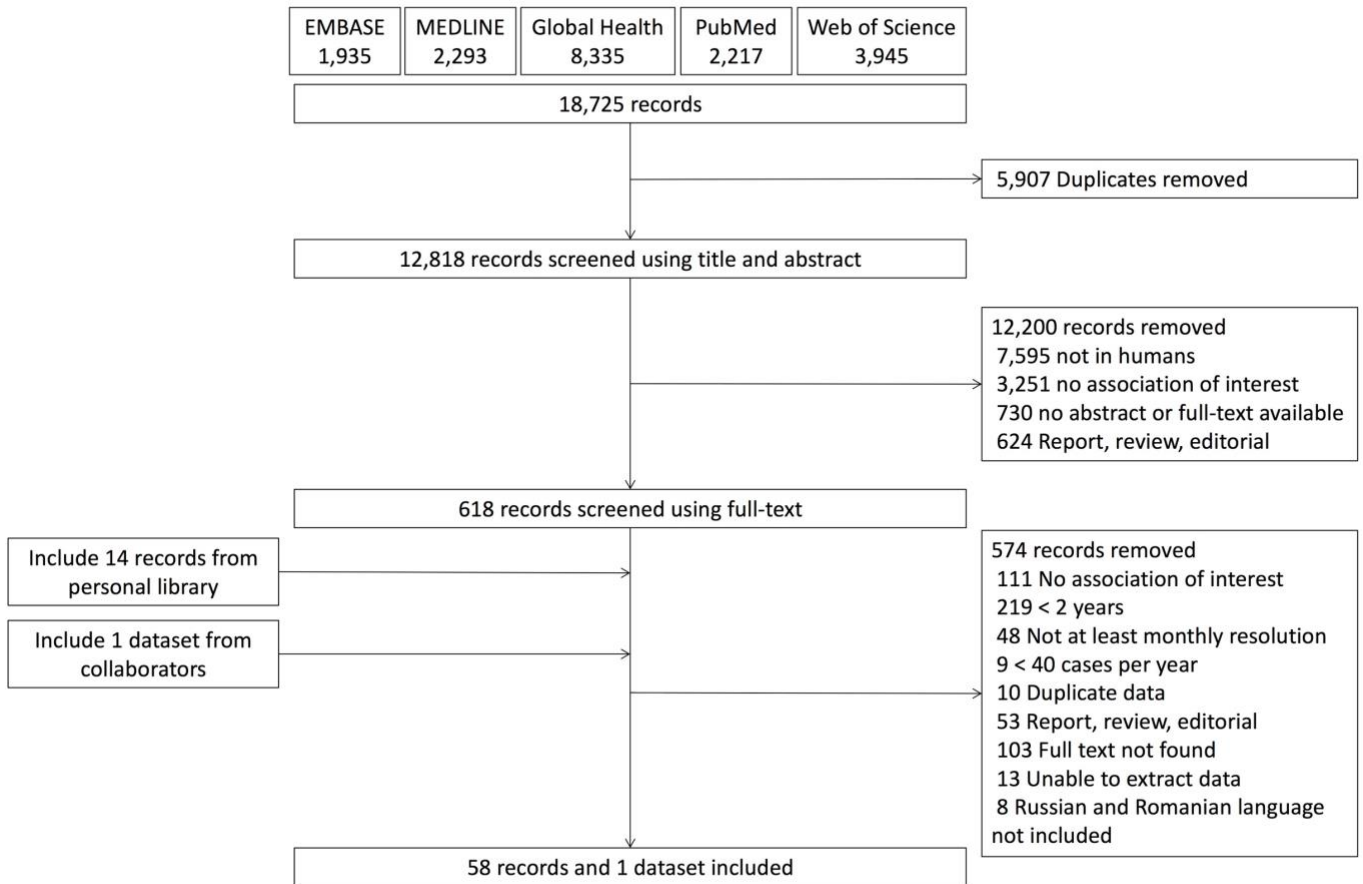

**Supplementary Figure 2. Seasonal dynamics of enteric and typhoid fever by continent and latitude by spatial scale.** The boxplots show the percentage of cases of the different studies for each month of the year.

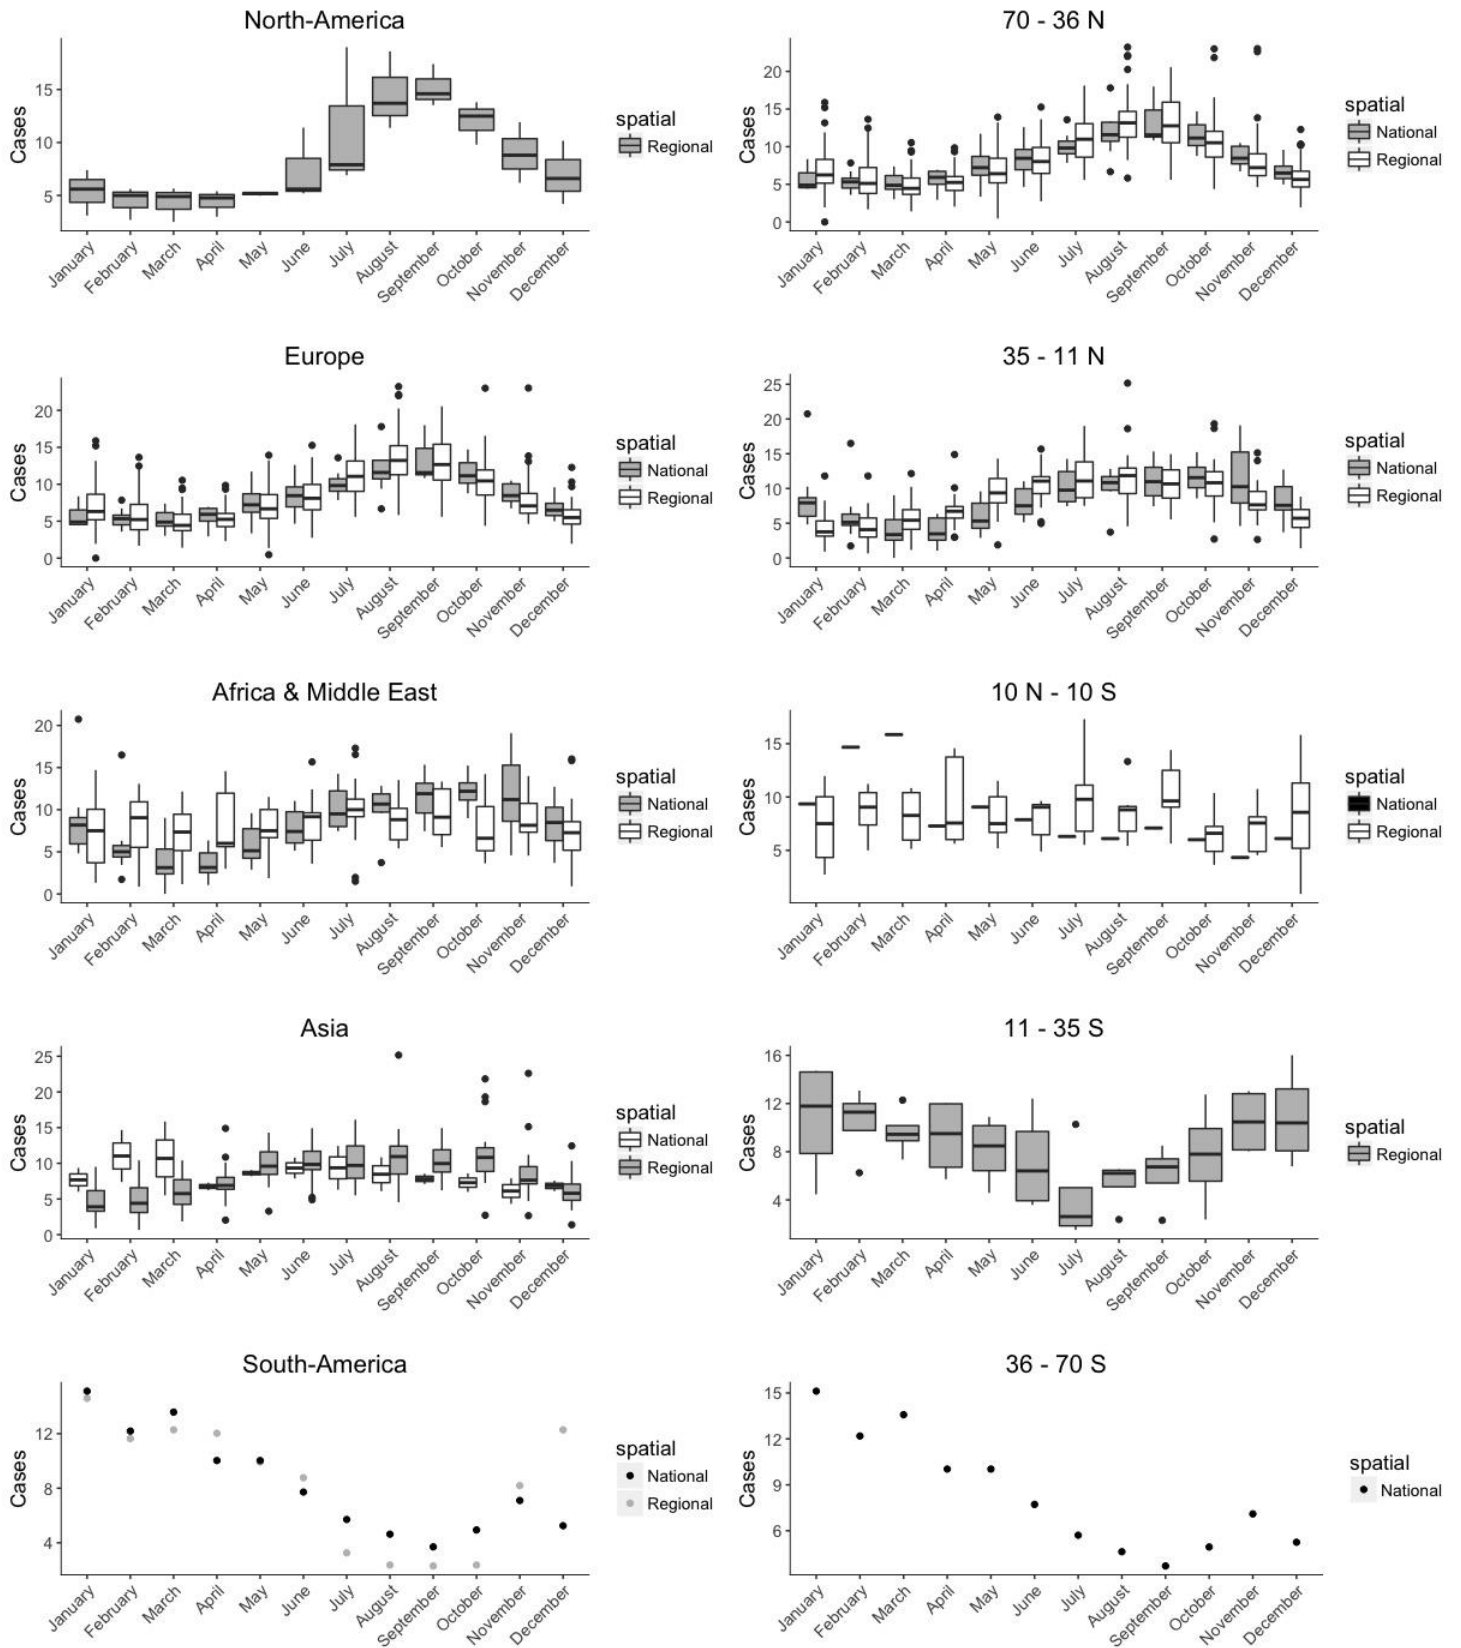

**Supplementary Figure 3. Seasonal dynamics of enteric and typhoid fever by continent and latitude by temporality.** Historical (<1990) and Contemporary ( $\geq 1990$ ). The boxplots show the percentage of cases of the different studies for each month of the year.

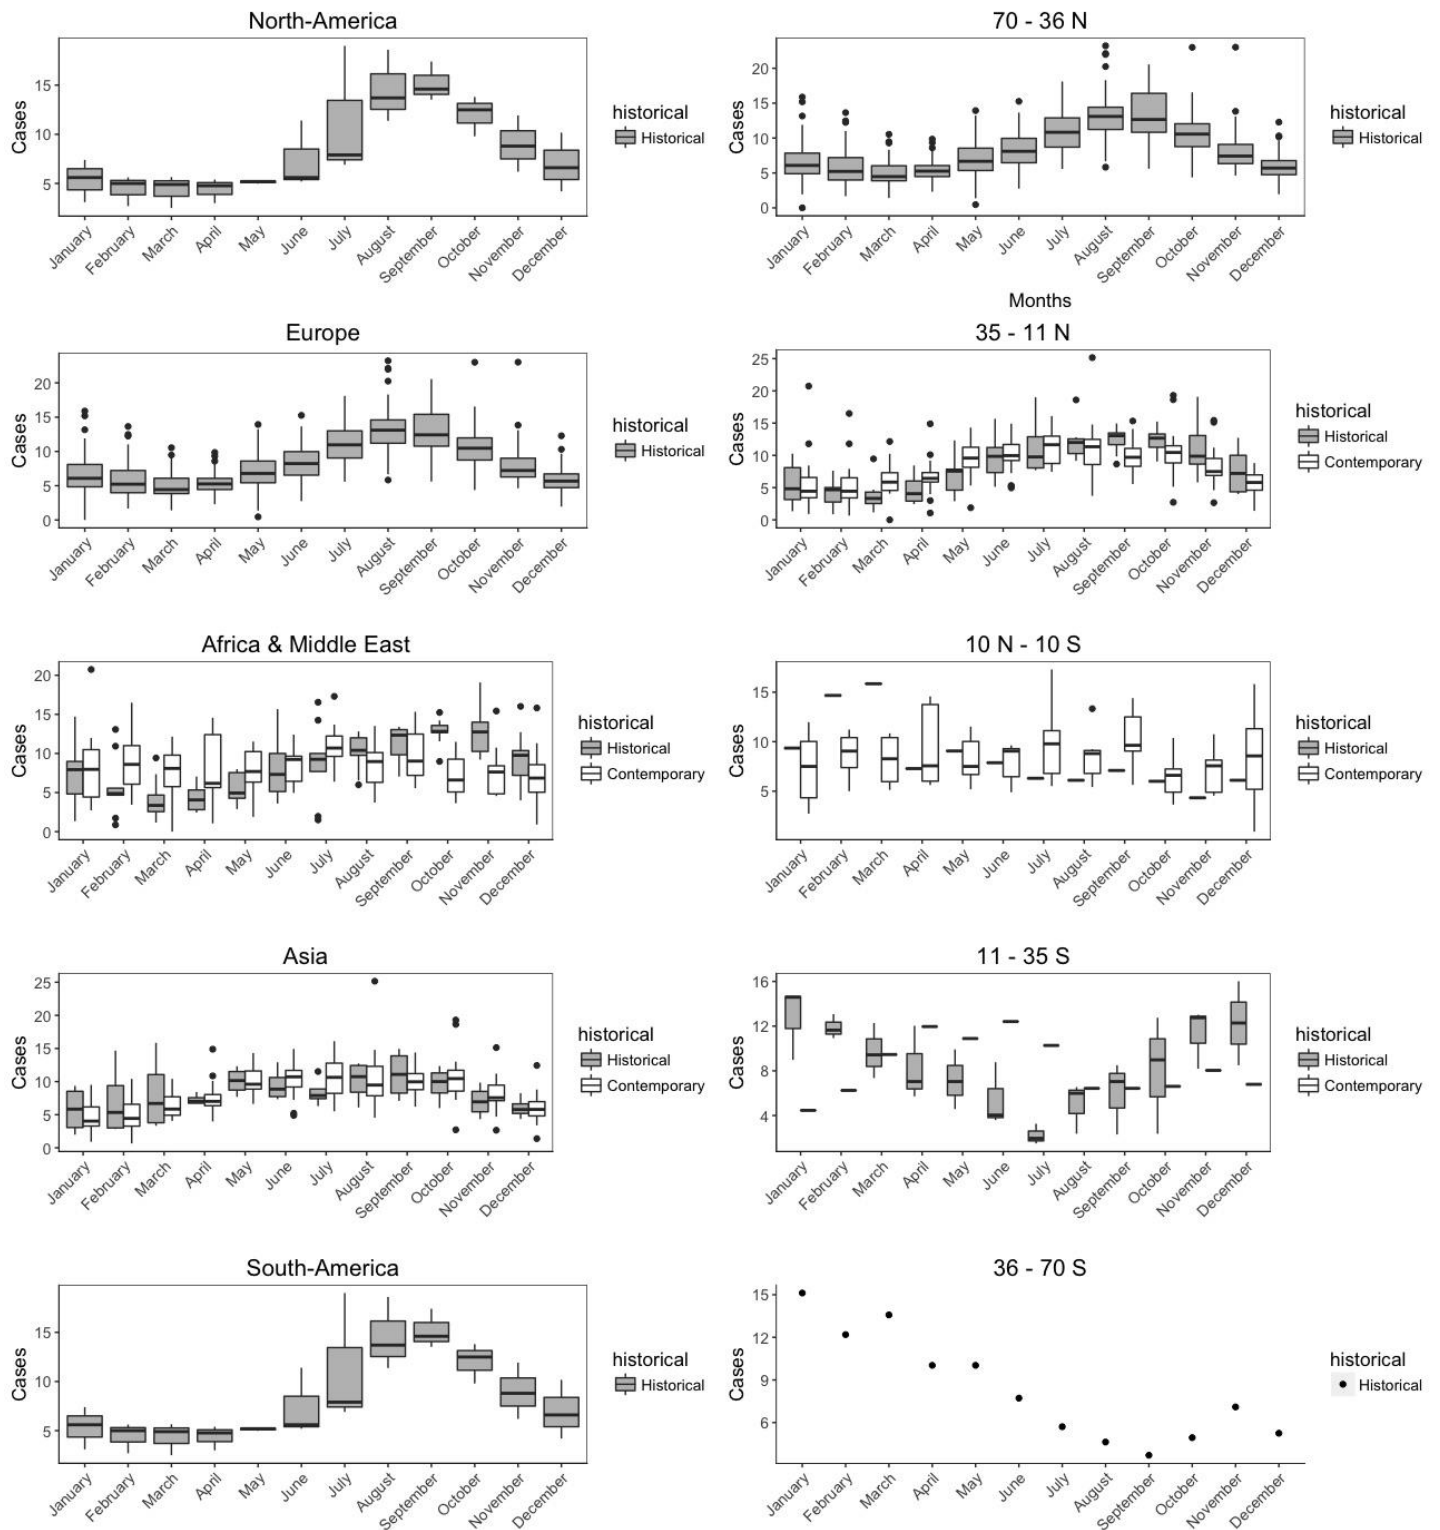

**Supplementary Figure 4. Seasonal dynamics of enteric and typhoid fever by continent and latitude by**

**disease.** The boxplots show the percentage of cases of the different studies for each month of the year.

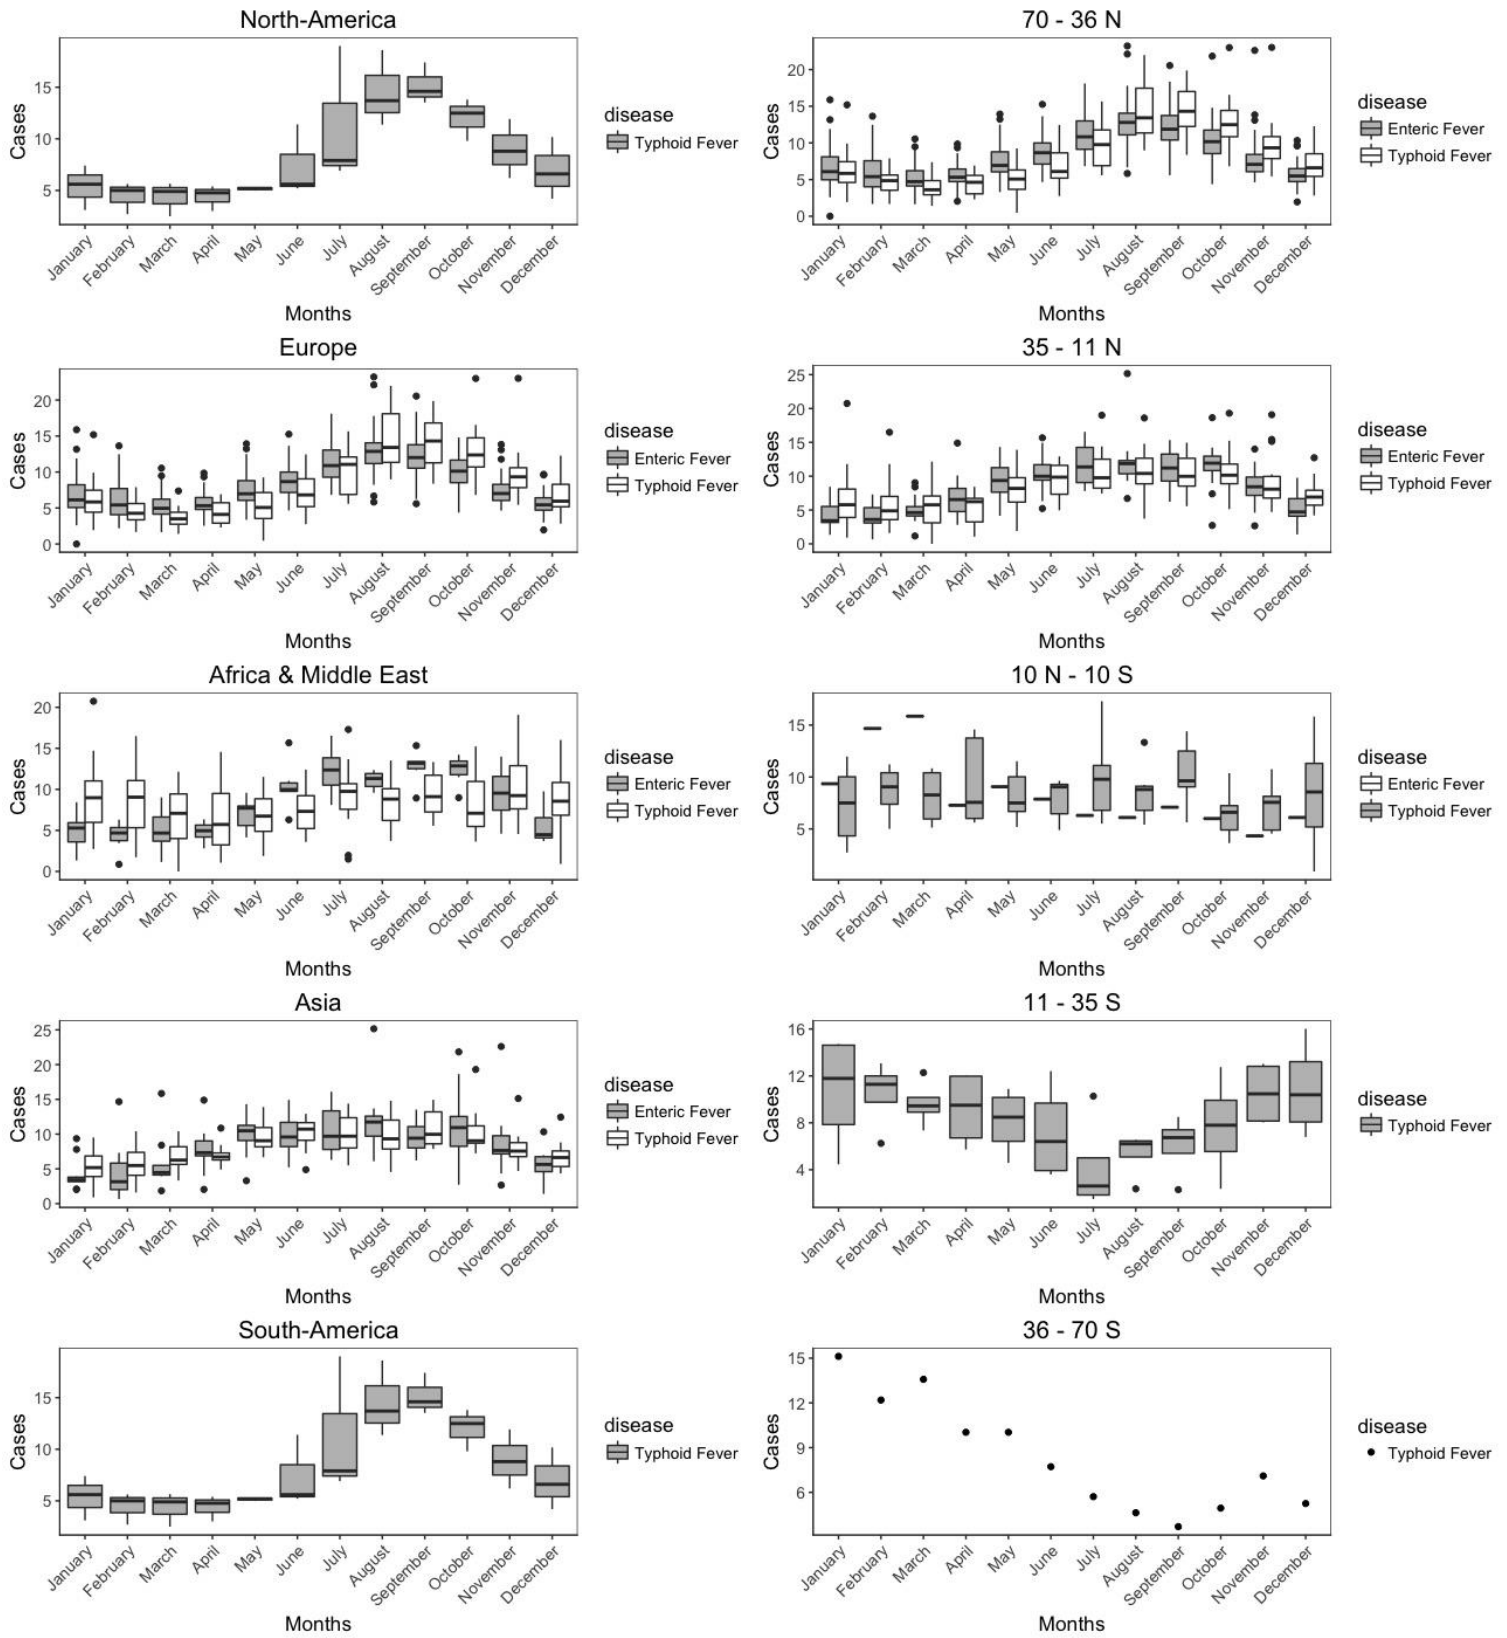

**Supplementary Figure 5. Mean timing of the peak and seasonal variation for contemporary ( $\geq 1990$ ) data on enteric and typhoid fever by spatial scale (*top*) and disease (*bottom*). Mean timing (as measured by center of gravity) is represented by the colored dots (Africa & Middle East) or triangles (Asia), while the lines represent the corresponding 95% confidence intervals. The seasonal variation is quantified by the seasonal intensity (peak/mean). Studies are ordered by latitude, from North (top) to South (bottom) and colored by spatial scale (National (Purple) and Regional (Blue)) or disease (Enteric (Purple) and Typhoid (Blue) fever).**

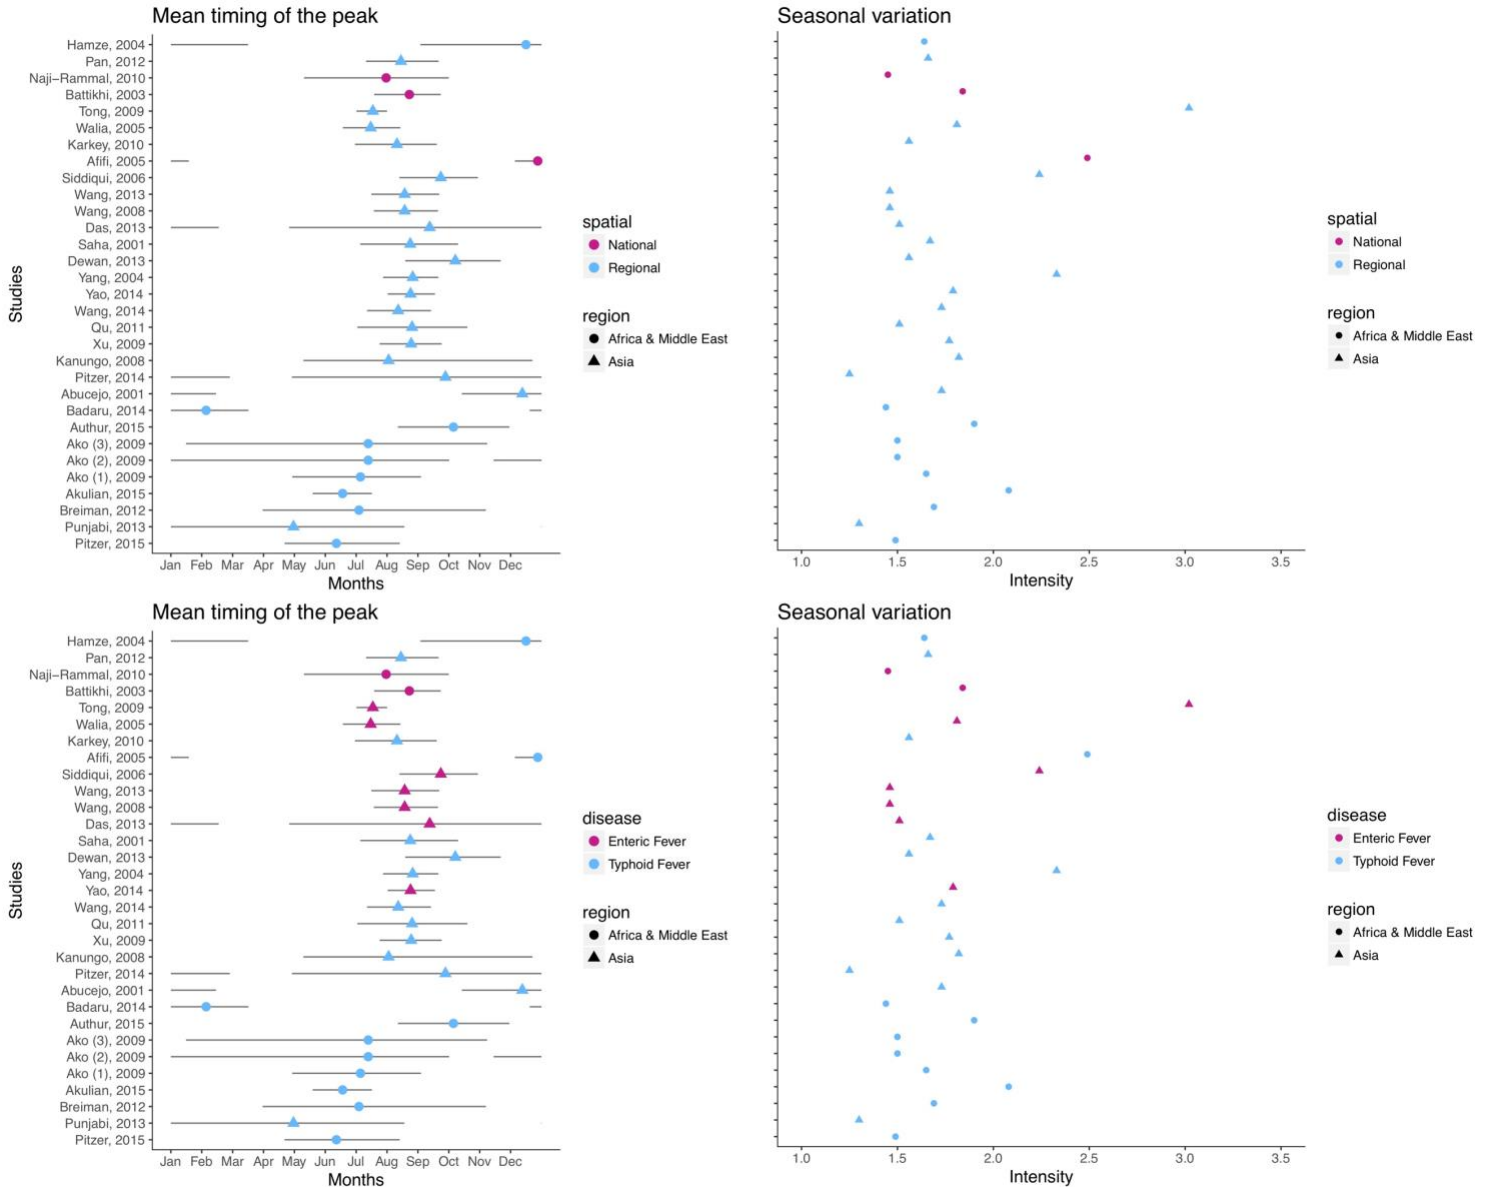

Supplementary Figure 6. Mean timing of the peak for contemporary ( $\geq 1990$ ) data on enteric and typhoid fever plotted against latitude.

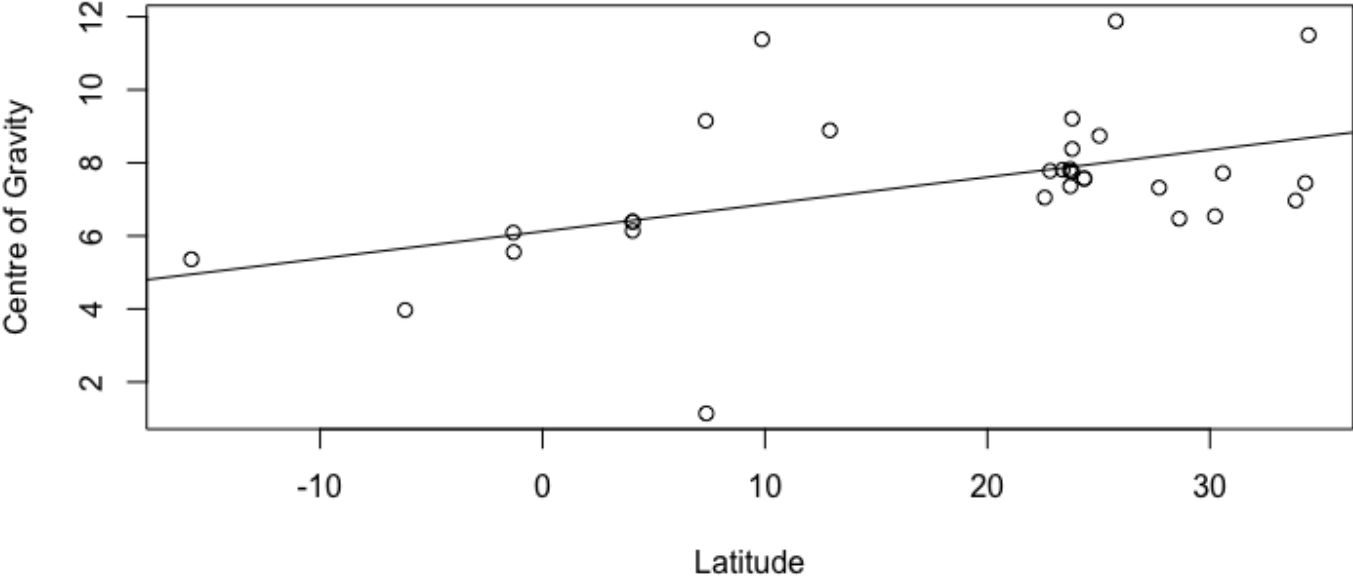

**Supplementary Figure 7. Mean timing of the peak and seasonal variation for historical (<1990) data on enteric and typhoid fever.** Mean timing (as measured by center of gravity) is represented by the colored dots, while the lines represent the corresponding 95% confidence intervals. The seasonal variation is quantified by the seasonal intensity (peak/mean). Studies are ordered by latitude, from North (top) to South (bottom) and colored by region: Africa & Middle East (Brown dots), Asia (Black triangle), North-America (Purple square), South-America (Blue cross) and Europe (Golden checked box).

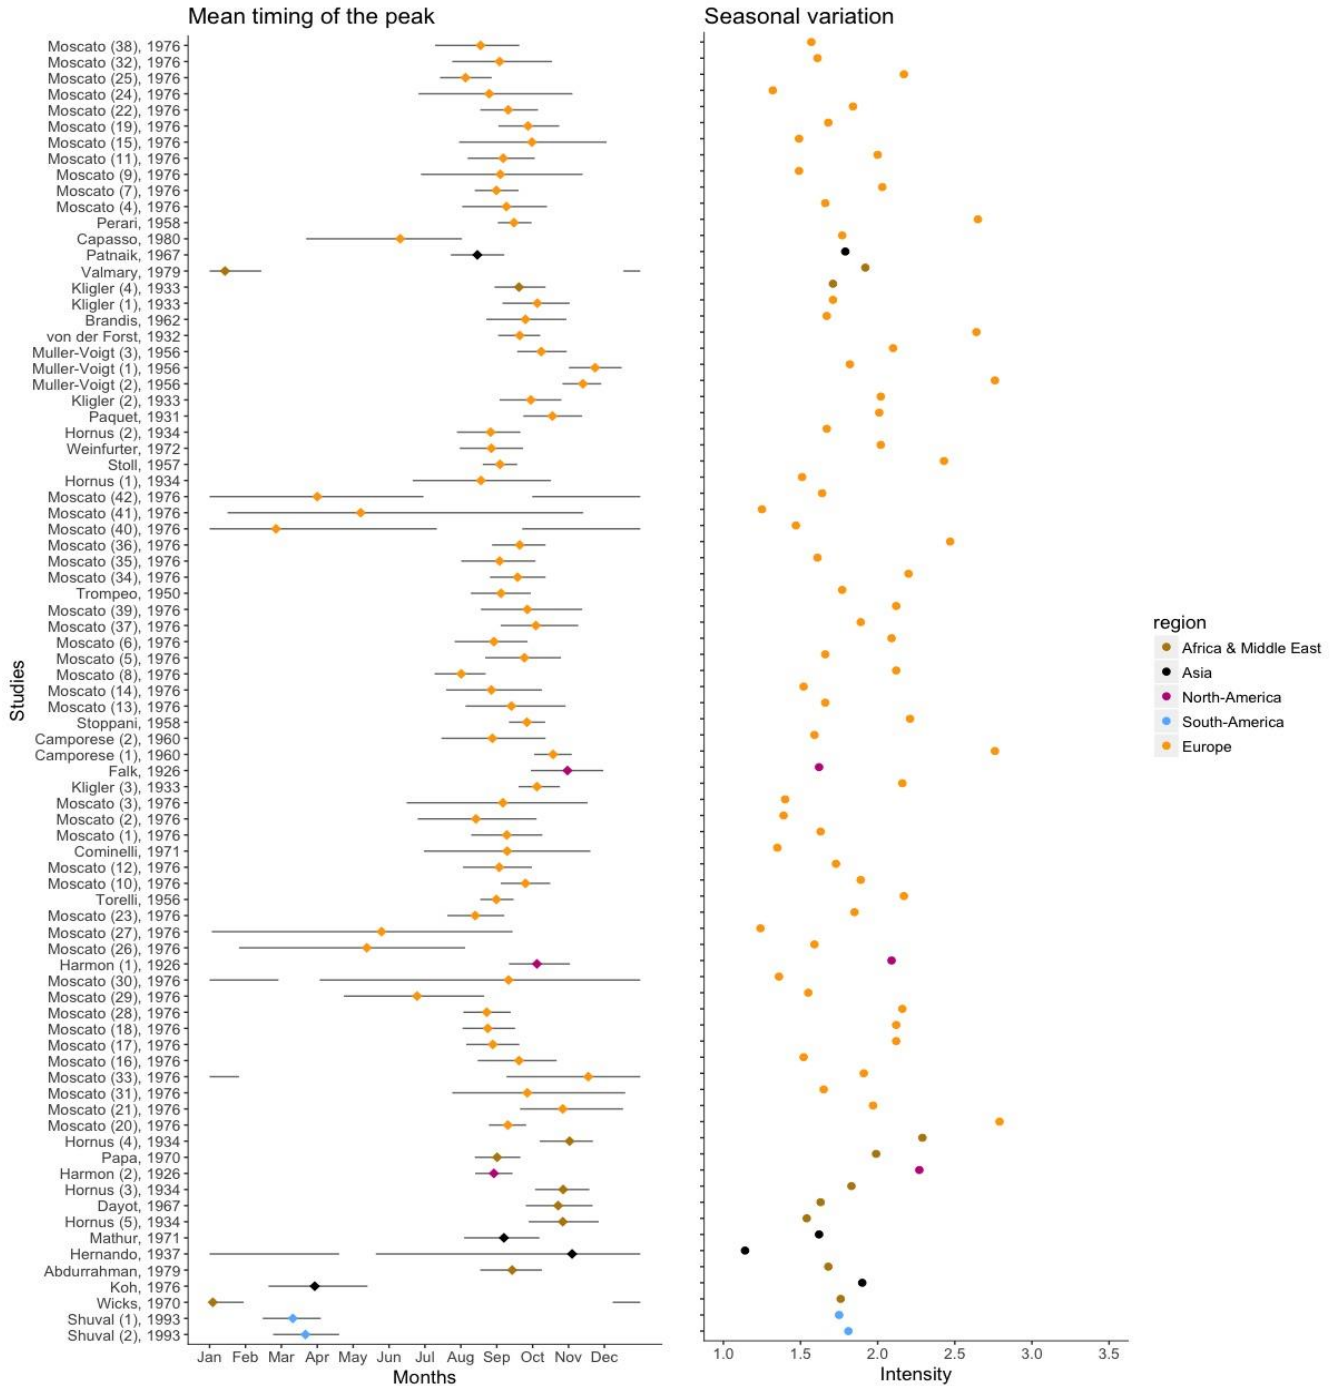



**Supplementary Figure 8. Seasonal variation as measured by seasonal intensity (peak/mean) and amplitude ([peak-trough]/peak) for contemporary ( $\geq 1990$ ) data on enteric and typhoid fever. Studies are ordered by latitude, from North (top) to South (bottom).**

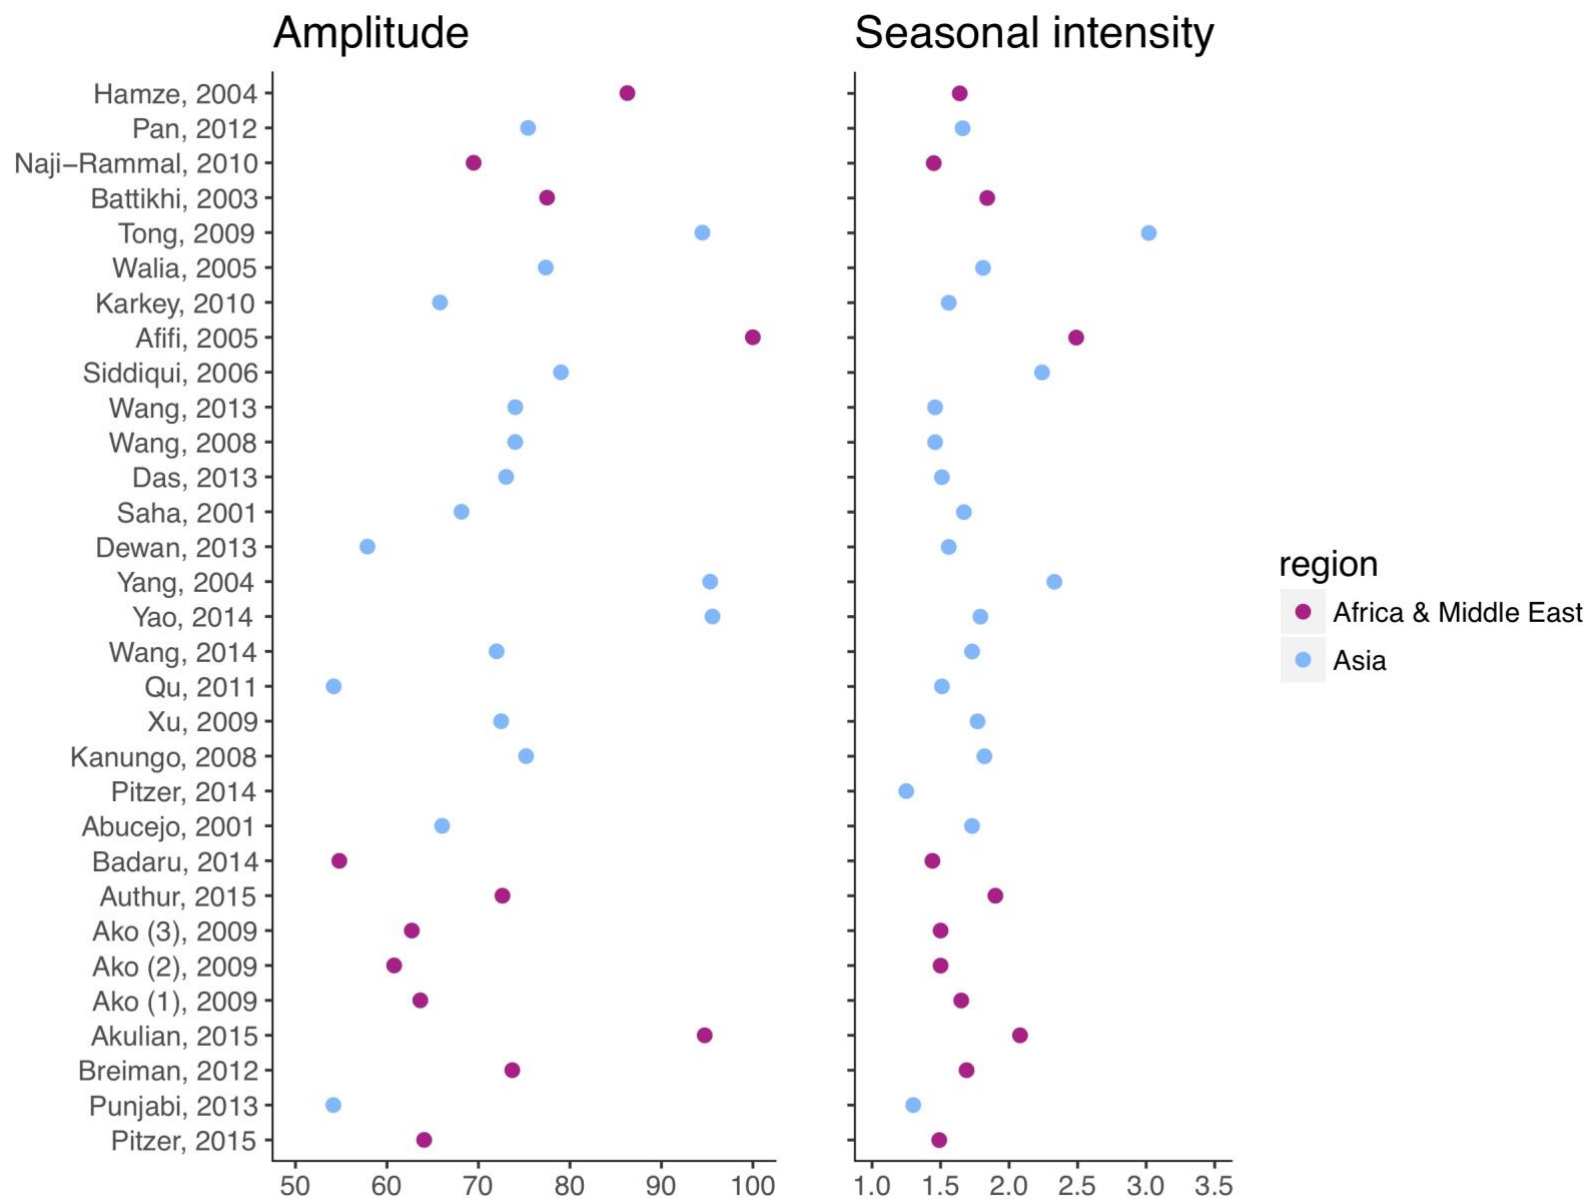

**Supplementary Figure 9. Association of environmental drivers with seasonal variation as measured by seasonal intensity (peak/mean) and amplitude ((peak-trough)/peak).** Coefficients from the meta-regression of the seasonal intensity (peak/mean) and amplitude ((peak-trough)/peak) against the average location-specific rainfall and temperature, the variation in average rainfall and temperature (peak/mean), and the study location's elevation for all datasets with subnational data are plotted. The point estimates of the regression coefficients are represented by dots, while the 95% confidence interval is indicated by a horizontal line.

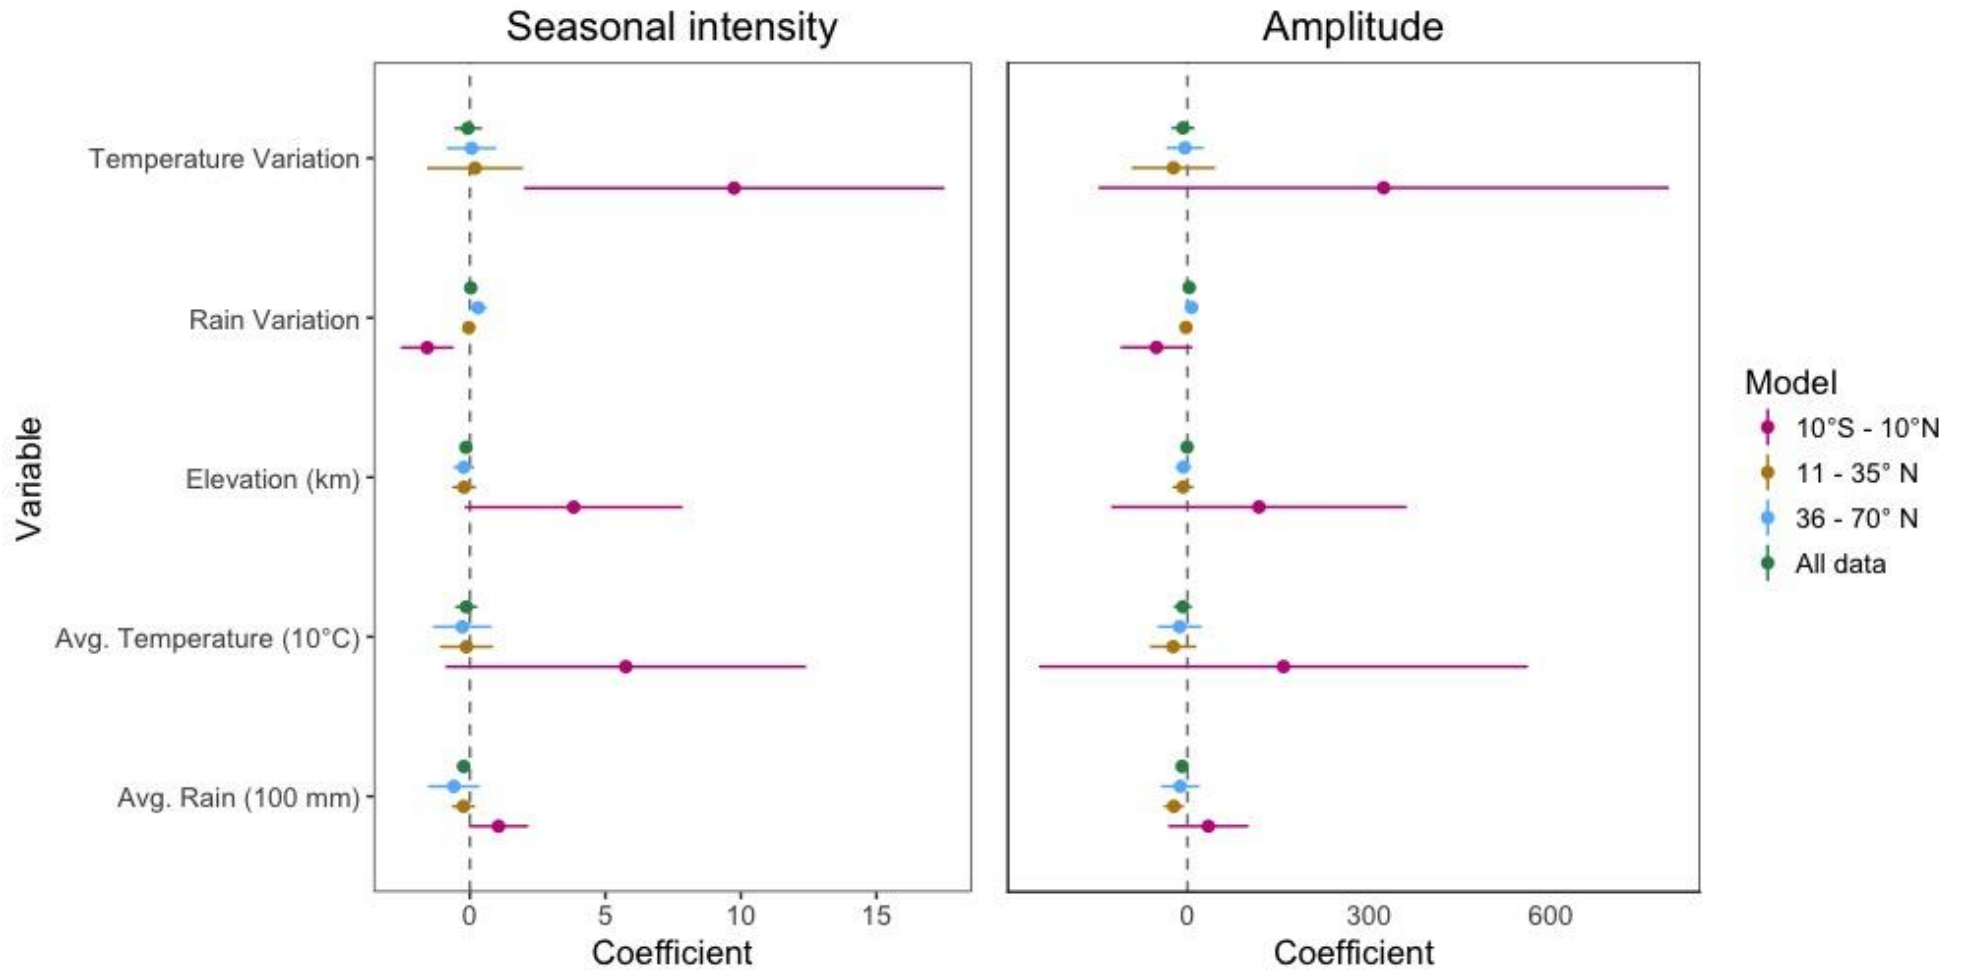

**Supplementary Figure 10. Seasonal dynamics of enteric and typhoid fever by continent and latitude for data confirmed by blood culture only.** The boxplots show the percentage of cases of the different studies for each month of the year and the red line depicts the mean percentage of cases for each month of the year.

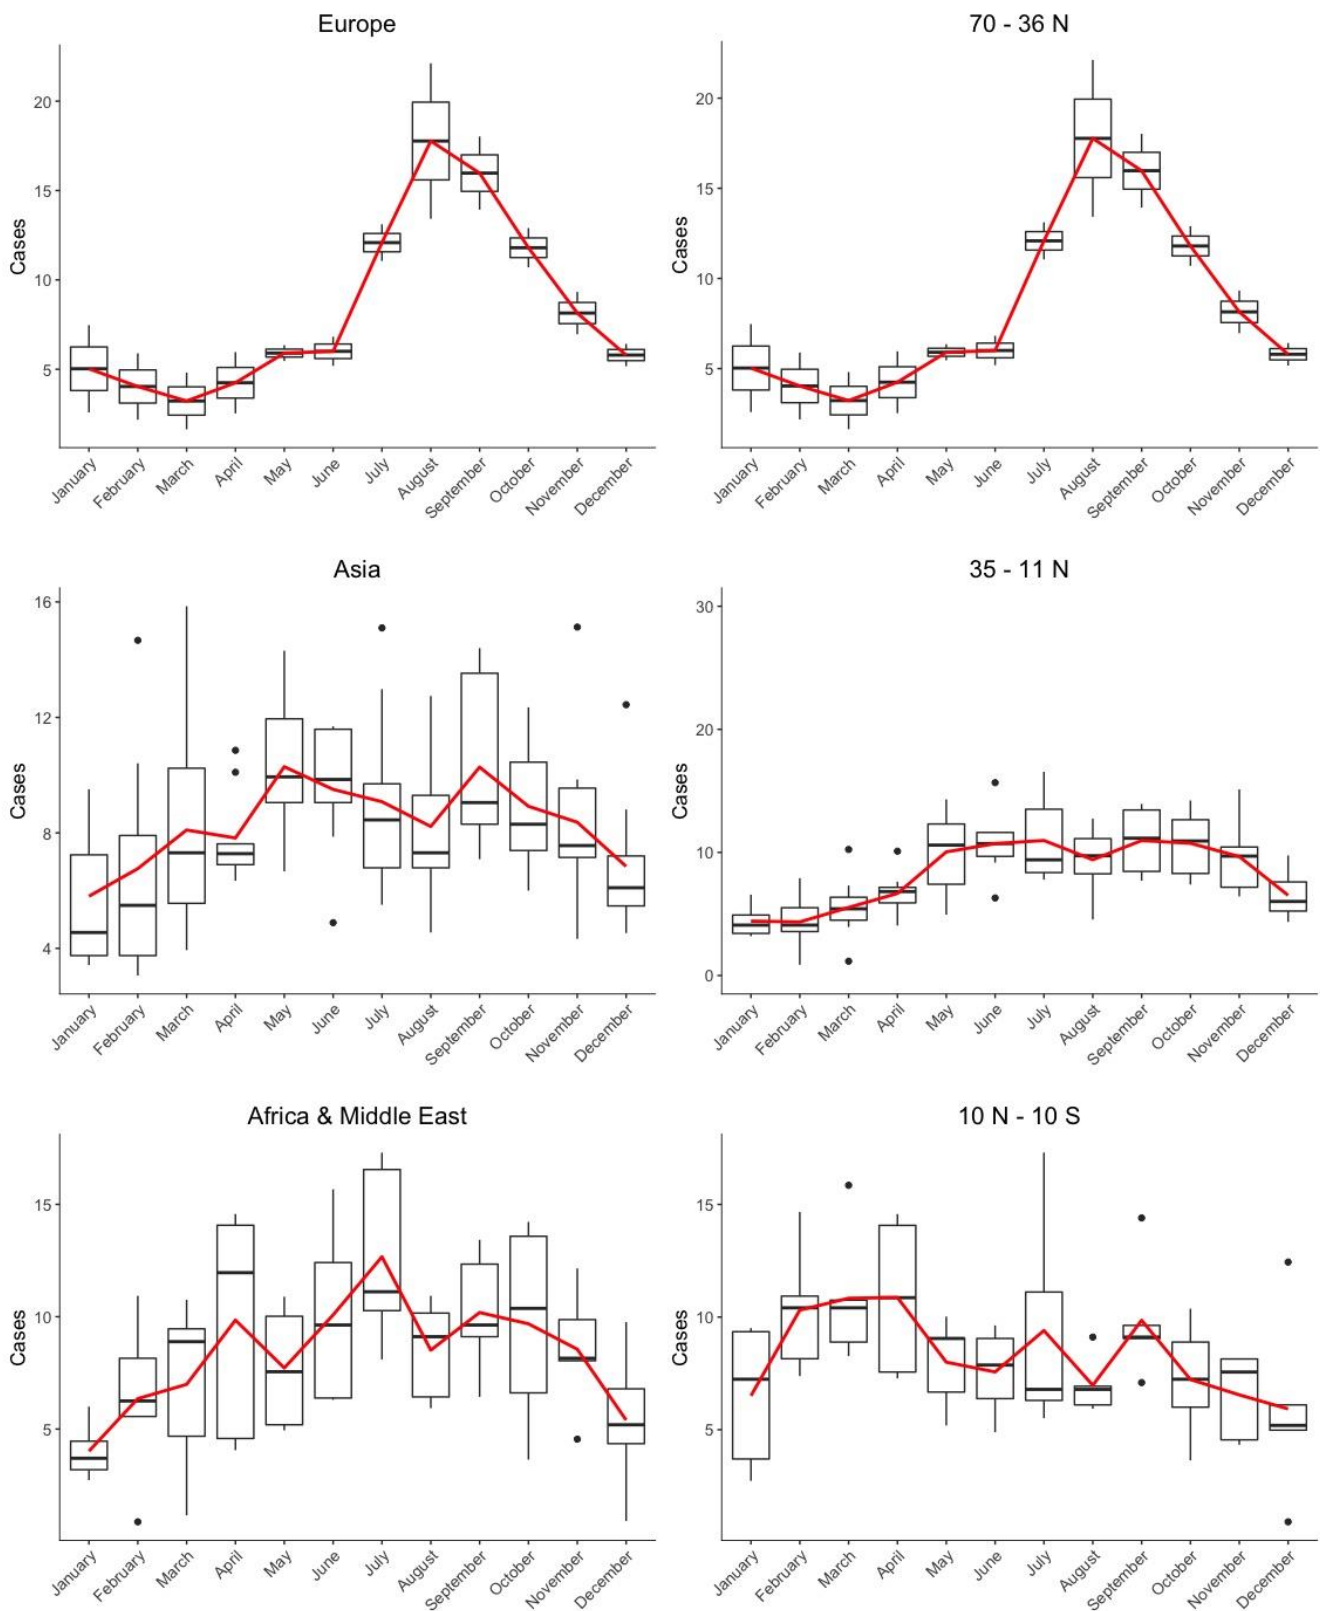

**Supplementary Figure 11. Mean timing of the peak and seasonal variation for data on enteric and typhoid fever, confirmed by blood culture only.** Mean timing (as measured by center of gravity) is represented by the colored dots, while the lines represent the corresponding 95% confidence intervals. The seasonal variation is quantified by the seasonal intensity (peak/mean). Studies are ordered by latitude, from North (top) to South (bottom) and colored by region: Africa & Middle East (Golden), Asia (Purple) and Europe (Blue).

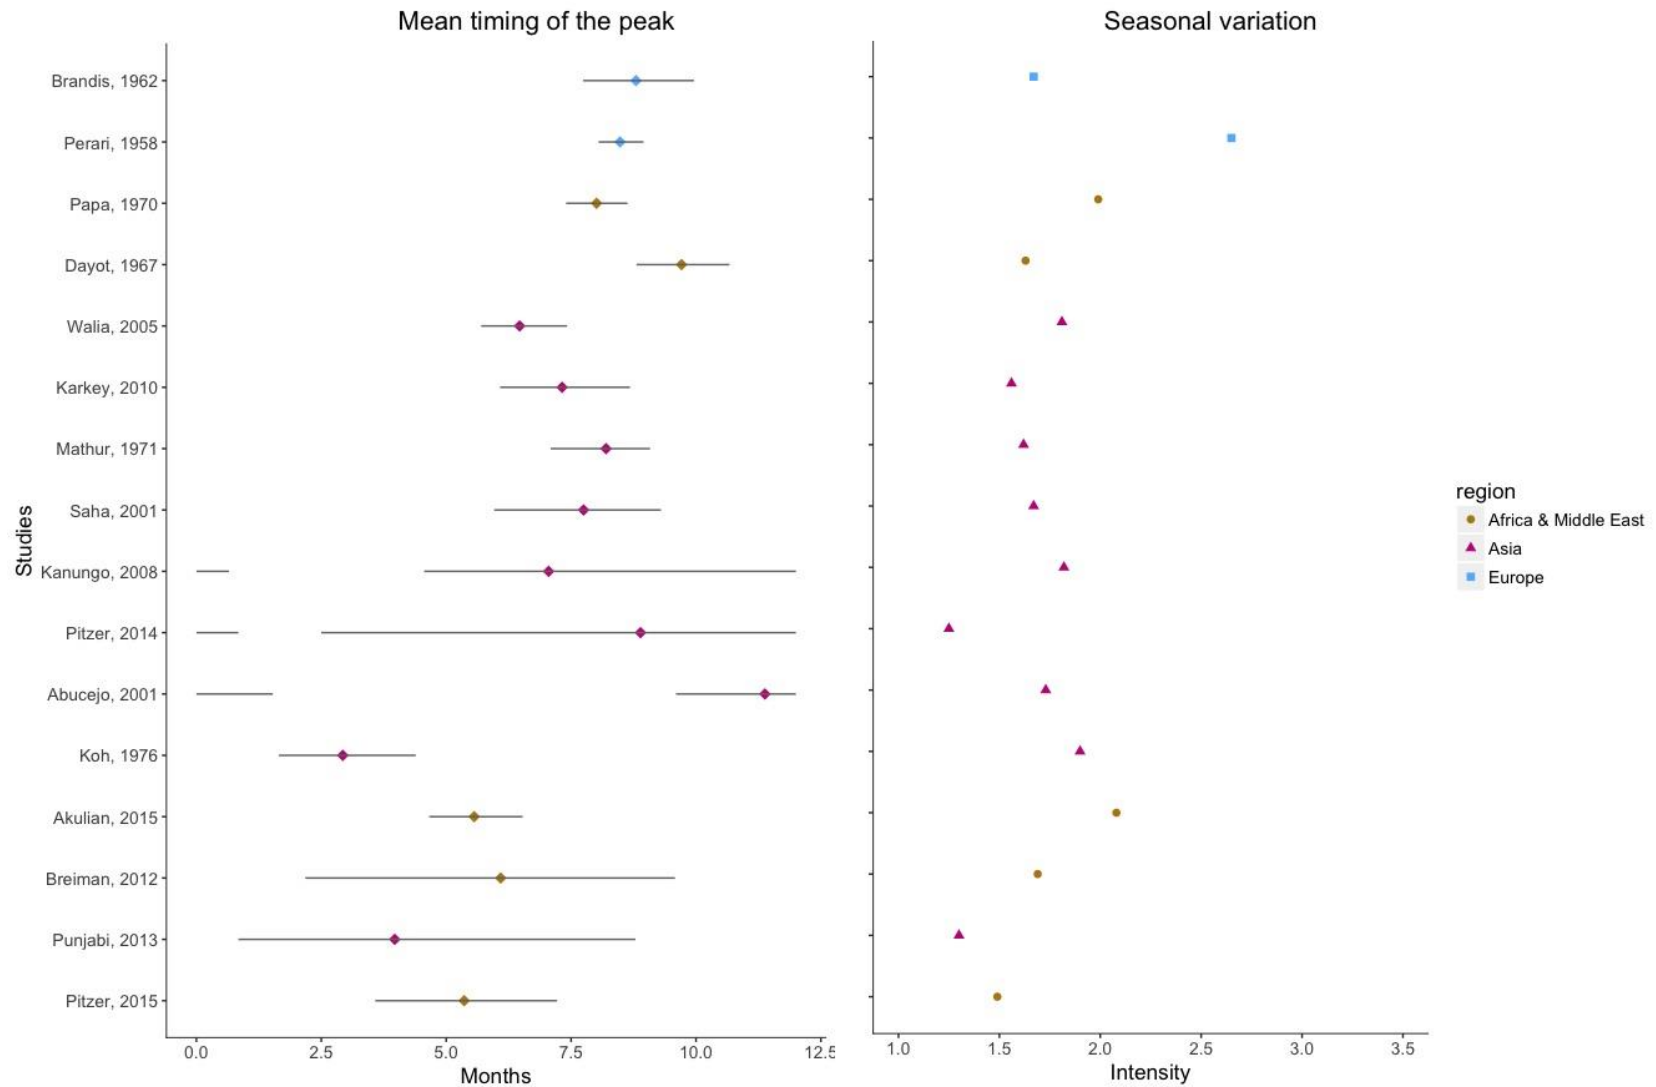

**Supplementary Figure 12. Association of environmental drivers with seasonal intensity (peak/mean) and amplitude ((peak-trough)/peak) for data confirmed by blood or bone marrow culture only.** Coefficients from the meta-regression of the seasonal intensity (peak/mean) and amplitude ((peak-trough)/peak) against the average location-specific rainfall and temperature, the variation in average rainfall and temperature (peak/mean), and the study location's elevation for all datasets with subnational data are plotted. The point estimates of the regression coefficients are represented by dots, while the 95% confidence interval is indicated by a horizontal line.

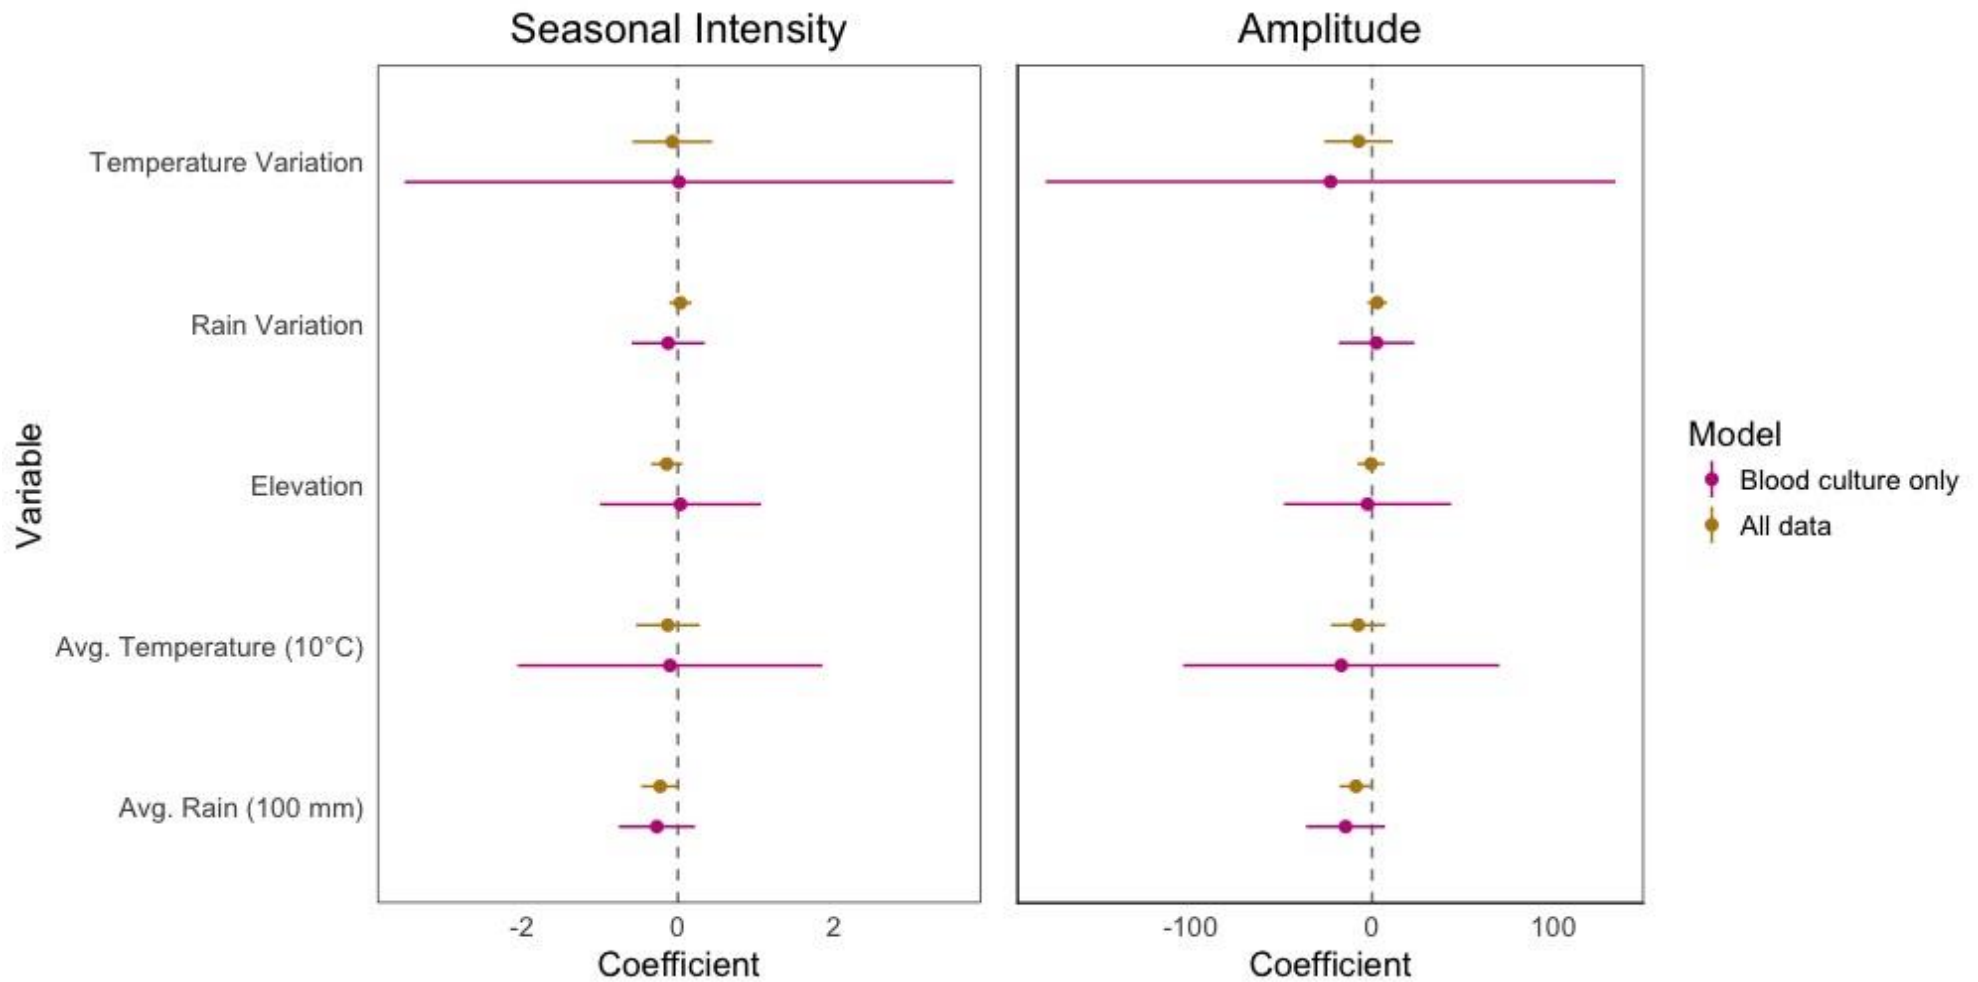

**Supplementary Figure 13. Association of enteric or typhoid fever with environmental drivers for all studies and studies confirmed by blood or bone marrow culture only.** The Pearson's correlation coefficient between enteric or typhoid fever and average monthly rainfall and average monthly temperature (current and lagged, up to 11 months) is summarized for all studies within a specified region. The values of the studies are represented in a boxplot, in which the whiskers represent the interquartile range (25<sup>th</sup> -75<sup>th</sup> percentile) times 1.5.

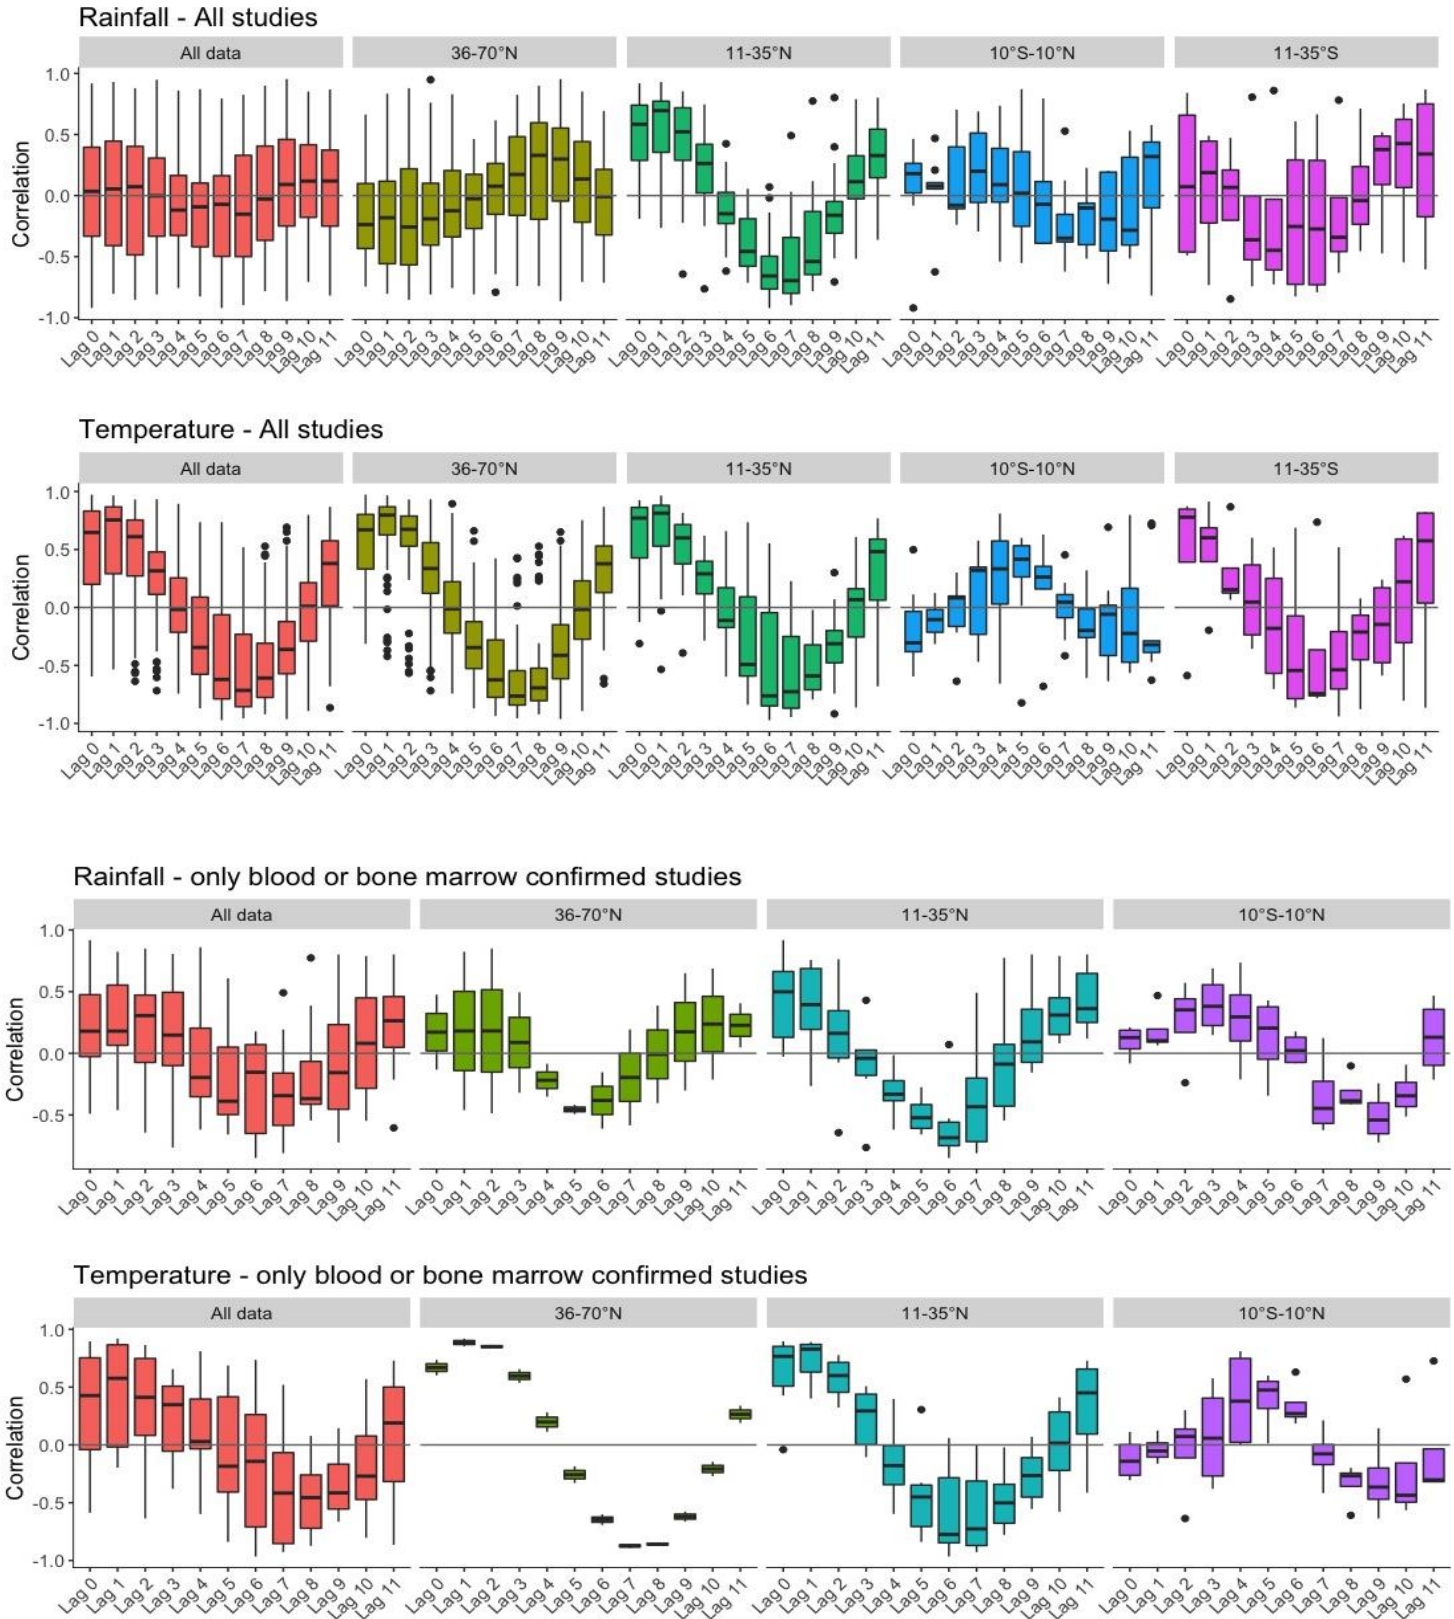



**Table S1. Search strategy.** We searched Embase, MEDLINE, Web of Science, PubMed and Global Health on the 16<sup>th</sup> of May 2016. We used both free text (FT) and controlled vocabulary (CV), except for Web of Science and PubMed where CV is not available. We used terms related to (para)typhoid and climatic variables (water/rain, temperature/heat, extreme weather events and climate/weather/season). We used Ovid to conduct the search of Embase, MEDLINE and Global Health and also restricted the search in these database to humans.

| Embase (Ovid)                                                                                                                                                                                                                                                                                   | MEDLINE (Ovid)                                                                                                                                                                                                                                                                                          | Web of Science                                                                                                                                                                                                                                                             | PubMed                                                                                                                                                                                                                                                                 | Global Health (Ovid)                                                                                                                                                                                                                                                                                    |
|-------------------------------------------------------------------------------------------------------------------------------------------------------------------------------------------------------------------------------------------------------------------------------------------------|---------------------------------------------------------------------------------------------------------------------------------------------------------------------------------------------------------------------------------------------------------------------------------------------------------|----------------------------------------------------------------------------------------------------------------------------------------------------------------------------------------------------------------------------------------------------------------------------|------------------------------------------------------------------------------------------------------------------------------------------------------------------------------------------------------------------------------------------------------------------------|---------------------------------------------------------------------------------------------------------------------------------------------------------------------------------------------------------------------------------------------------------------------------------------------------------|
| <b>Database: Embase 1974 to 2016<br/>May 13</b>                                                                                                                                                                                                                                                 | <b>Database: Medline 1946 to May<br/>Week 1 2016</b>                                                                                                                                                                                                                                                    | <b>Database: Web of Science<br/>Core collection</b>                                                                                                                                                                                                                        | <b>Database: Medline<br/>(index/non-indexed) and<br/>PubMed central</b>                                                                                                                                                                                                | <b>Database: Global Health 1910<br/>to 2016 Week 18</b>                                                                                                                                                                                                                                                 |
| <b>(PARA)TYPHOID</b>                                                                                                                                                                                                                                                                            | <b>(PARA)TYPHOID</b>                                                                                                                                                                                                                                                                                    | <b>(PARA)TYPHOID</b>                                                                                                                                                                                                                                                       | <b>(PARA)TYPHOID</b>                                                                                                                                                                                                                                                   | <b>(PARA)TYPHOID</b>                                                                                                                                                                                                                                                                                    |
| <b>FT:</b> (typhoid* or abdominal adj2 typhus or enteric adj2 fever* or typhus abdominalis).mp.<br><i>or</i><br><b>FT:</b> (paratyphoid* or paratyphus).mp.<br><i>or</i><br><b>FT:</b> (Salmonella enterica or Salmonella typhi or Salmonella typhosa or Salmonella paratyphi).mp.<br><i>or</i> | <b>FT:</b> ((typhoid*) or (abdominal adj2 typhus) or (enteric adj2 fever*) or (typhus abdominalis)).mp.<br><i>or</i><br><b>FT:</b> (paratyphoid* or paratyphus).mp.<br><i>or</i><br><b>FT:</b> (Salmonella enterica or Salmonella typhi or Salmonella typhosa or Salmonella paratyphi).mp.<br><i>or</i> | <b>FT:</b> (typhoid* or abdominal near/2 typhus or enteric near/2 fever* or typhus abdominalis)<br><i>or</i><br><b>FT:</b> (paratyphoid* or paratyphus)<br><i>or</i><br><b>FT:</b> (Salmonella enterica or Salmonella typhi or Salmonella typhosa or Salmonella paratyphi) | <b>FT:</b> (typhoid* or abdominal adj2 typhus or enteric adj2 fever* or typhus abdominalis)<br><i>or</i><br><b>FT:</b> (paratyphoid* or paratyphus)<br><i>or</i><br><b>FT:</b> (Salmonella enterica or Salmonella typhi or Salmonella typhosa or Salmonella paratyphi) | <b>FT:</b> ((typhoid*) or (abdominal adj2 typhus) or (enteric adj2 fever*) or (typhus abdominalis)).mp.<br><i>or</i><br><b>FT:</b> (paratyphoid* or paratyphus).mp.<br><i>or</i><br><b>FT:</b> (Salmonella enterica or Salmonella typhi or Salmonella typhosa or Salmonella paratyphi).mp.<br><i>or</i> |
|                                                                                                                                                                                                                                                                                                 |                                                                                                                                                                                                                                                                                                         | <b>AND</b>                                                                                                                                                                                                                                                                 | <b>AND</b>                                                                                                                                                                                                                                                             |                                                                                                                                                                                                                                                                                                         |
|                                                                                                                                                                                                                                                                                                 |                                                                                                                                                                                                                                                                                                         | <b>CLIMATIC VARIABLES</b>                                                                                                                                                                                                                                                  | <b>CLIMATIC VARIABLES</b>                                                                                                                                                                                                                                              |                                                                                                                                                                                                                                                                                                         |

|                                                                                                                                                                                                                    |                                                                                                                                                                                 |                                                                                                                                                                                     |                                                                                                                                                                                 |                                                                                                                                                                                                        |
|--------------------------------------------------------------------------------------------------------------------------------------------------------------------------------------------------------------------|---------------------------------------------------------------------------------------------------------------------------------------------------------------------------------|-------------------------------------------------------------------------------------------------------------------------------------------------------------------------------------|---------------------------------------------------------------------------------------------------------------------------------------------------------------------------------|--------------------------------------------------------------------------------------------------------------------------------------------------------------------------------------------------------|
| <p>CV: exp salmonella enterica/ or typhoid fever/ or paratyphoid fever/</p>                                                                                                                                        | <p>CV: exp salmonella enterica/ or Typhoid Fever/ or Paratyphoid Fever/</p>                                                                                                     | <p><b>WATER/RAIN</b></p> <p>FT: (rain* or water* or groundwater* or freshwater* or runoff or run-off or humid* or moist* or river* or ocean* or sea* or lake* or pond or ponds)</p> | <p><b>WATER/RAIN</b></p> <p>(rain* or water* or groundwater* or freshwater* or runoff or run-off or humid* or moist* or river* or ocean* or sea* or lake* or pond or ponds)</p> | <p>CV: exp "salmonella enterica subsp. enterica"/or typhoid/ or paratyphoid/</p>                                                                                                                       |
| <hr/> <p style="text-align: center;"><b>AND</b></p>                                                                                                                                                                | <hr/> <p style="text-align: center;"><b>AND</b></p>                                                                                                                             |                                                                                                                                                                                     |                                                                                                                                                                                 | <hr/> <p style="text-align: center;"><b>AND</b></p>                                                                                                                                                    |
| <hr/> <p style="text-align: center;"><b>CLIMATIC VARIABLES</b></p>                                                                                                                                                 | <hr/> <p style="text-align: center;"><b>CLIMATIC VARIABLES</b></p>                                                                                                              |                                                                                                                                                                                     |                                                                                                                                                                                 | <hr/> <p style="text-align: center;"><b>CLIMATIC VARIABLES</b></p>                                                                                                                                     |
| <hr/> <p><b>WATER/RAIN</b></p>                                                                                                                                                                                     | <hr/> <p><b>WATER/RAIN</b></p>                                                                                                                                                  |                                                                                                                                                                                     |                                                                                                                                                                                 | <hr/> <p><b>WATER/RAIN</b></p>                                                                                                                                                                         |
| <p>FT: (rain* or water* or groundwater* or freshwater* or runoff or run-off or humid* or moist* or river* or ocean* or sea* or lake* or pond or ponds).mp.</p> <p><i>or</i></p>                                    | <p>FT: (rain* or water* or groundwater* or freshwater* or runoff or run-off or humid* or moist* or river* or ocean* or sea* or lake* or pond or ponds).mp.</p> <p><i>or</i></p> | <p><i>Or</i></p>                                                                                                                                                                    | <p><i>Or</i></p>                                                                                                                                                                | <p>FT: (rain* or water* or groundwater* or freshwater* or runoff or run-off or humid* or moist* or river* or ocean* or sea* or lake* or pond or ponds).mp.</p> <p><i>or</i></p>                        |
| <p>CV: rain/ or humidity/ or water/ or groundwater/ or freshwater/ or runoff/ or water vapour/ or water flow/ or river/ or river water/ or “stream (river)”/ or ocean current/ or sea/ or lake/ or lake water/</p> | <p>CV: "Oceans and Seas"/ or Rain/ or Humidity/ or Water/ or groundwater/ or exp freshwater/ or Water Movements/</p>                                                            | <hr/> <p><b>TEMPERATURE/ HEAT</b></p>                                                                                                                                               | <hr/> <p><b>TEMPERATURE/ HEAT</b></p>                                                                                                                                           | <p>CV: rain/ or humidity/ or moisture/ or water/ or groundwater/ or runoff/ or coastal water/ or water vapour/ or water flow/ or rivers/ or river water/ or streams/ or oceans/ or seas/ or lakes/</p> |
| <hr/> <p><b>TEMPERATURE/ HEAT</b></p>                                                                                                                                                                              | <hr/> <p><b>TEMPERATURE/ HEAT</b></p>                                                                                                                                           | <hr/> <p><b>EXTREME WEATHER</b></p>                                                                                                                                                 | <hr/> <p><b>EXTREME WEATHER</b></p>                                                                                                                                             | <hr/> <p><b>EXTREME WEATHER</b></p>                                                                                                                                                                    |
| <p>FT: (temperature or heat or warmth).mp.</p> <p><i>or</i></p>                                                                                                                                                    | <p>FT: (temperature* or heat or warmth).mp.</p> <p><i>or</i></p>                                                                                                                | <p>FT: (storm* or cyclon* or hurricane* or monsoon* or typhoon* or flood* or drought*)</p> <p><i>Or</i></p>                                                                         | <p>FT: (temperature or heat or warmth)</p> <p><i>Or</i></p>                                                                                                                     | <p>FT: (storm* or cyclon* or hurricane* or monsoon* or typhoon* or flood* or drought*)</p> <p><i>Or</i></p>                                                                                            |
| <p><i>or</i></p>                                                                                                                                                                                                   | <p><i>or</i></p>                                                                                                                                                                | <hr/> <p><b>CLIMATE/ WEATHER/ SEASON</b></p>                                                                                                                                        | <hr/> <p><b>CLIMATE/ WEATHER/ SEASON</b></p>                                                                                                                                    | <hr/> <p><b>CLIMATE/ WEATHER/ SEASON</b></p>                                                                                                                                                           |
| <p>CV: exp temperature/ or heat/</p>                                                                                                                                                                               | <p>CV: exp Temperature/</p>                                                                                                                                                     |                                                                                                                                                                                     |                                                                                                                                                                                 | <hr/> <p><b>TEMPERATURE/ HEAT</b></p>                                                                                                                                                                  |
| <hr/>                                                                                                                                                                                                              | <hr/>                                                                                                                                                                           |                                                                                                                                                                                     |                                                                                                                                                                                 | <p>FT: (temperature or heat or warmth).mp.</p> <p><i>or</i></p>                                                                                                                                        |



|                                                                                                                                                                                                                                                               |                                                                                                                                                                                                                                                    |                                                                                              |                                                                                              |                                                                                                                                                                                                                                                                                                      |
|---------------------------------------------------------------------------------------------------------------------------------------------------------------------------------------------------------------------------------------------------------------|----------------------------------------------------------------------------------------------------------------------------------------------------------------------------------------------------------------------------------------------------|----------------------------------------------------------------------------------------------|----------------------------------------------------------------------------------------------|------------------------------------------------------------------------------------------------------------------------------------------------------------------------------------------------------------------------------------------------------------------------------------------------------|
| <p><b>EXTREME WEATHER</b></p> <p><b>EVENTS</b></p> <p><b>FT:</b> (storm* or cyclon* or hurricane* or monsoon* or typhoon* or flood* or drought*).mp.</p> <p><i>or</i></p> <p><b>CV:</b> storm water/ or hurricane/ or flooding/ or drought/</p>               | <p><b>EXTREME WEATHER</b></p> <p><b>EVENTS</b></p> <p><b>FT:</b> (storm* or cyclon* or hurricane* or monsoon* or typhoon* or flood* or drought*).mp.</p> <p><i>or</i></p> <p><b>CV:</b> Cyclonic Storms/ or Floods/ or Droughts/</p>               | <p><b>FT:</b> (weather or season* or (climate change) or cline* or El Nino* or La Nina*)</p> | <p><b>FT:</b> (weather or season* or (climate change) or cline* or El Nino* or La Nina*)</p> | <p><b>CV:</b> exp temperature/ or heat/</p>                                                                                                                                                                                                                                                          |
| <hr/> <p><b>CLIMATE/ WEATHER/</b></p> <p><b>SEASON</b></p> <p><b>FT:</b> (weather or season* or (climate change) or cline* or El Nino* or La Nina*).mp.</p> <p><i>or</i></p> <p><b>CV:</b> weather/ or season/ or climate/ or climate change/ or el nino/</p> | <hr/> <p><b>CLIMATE/ WEATHER/</b></p> <p><b>SEASON</b></p> <p><b>FT:</b> (weather or season* or (climate change) or cline* or El Nino* or La Nina*).mp.</p> <p><i>or</i></p> <p><b>CV:</b> Weather/ or Seasons/ or Climate Change/ or el nino/</p> |                                                                                              |                                                                                              | <hr/> <p><b>EXTREME WEATHER</b></p> <p><b>EVENTS</b></p> <p><b>FT:</b> (storm* or cyclon* or hurricane* or monsoon* or typhoon* or flood* or drought*).mp.</p> <p><i>or</i></p> <p><b>CV:</b> storms/ or hurricanes/ or monsoon/ or floods/ or flooding/ or drought/</p>                             |
|                                                                                                                                                                                                                                                               |                                                                                                                                                                                                                                                    |                                                                                              |                                                                                              | <hr/> <p><b>CLIMATE/ WEATHER/</b></p> <p><b>SEASON</b></p> <p><b>FT:</b> (weather or season* or (climate change) or cline* or El Nino* or La Nina*).mp.</p> <p><i>or</i></p> <p><b>CV:</b> weather/ or seasonality/ or “seasonal variation”/ or climate change/ or el nino-southern oscillation/</p> |

**Supplementary Table 2. Characteristics of the included datasets.**

| <b>Africa &amp; Middle East</b> |                             |                     |                                                           |                |                                                       |                               |
|---------------------------------|-----------------------------|---------------------|-----------------------------------------------------------|----------------|-------------------------------------------------------|-------------------------------|
| <b>Author, year</b>             | <b>City/Region, Country</b> | <b>Time period</b>  | <b>Incidence (annual average, per 100,000 population)</b> | <b>Disease</b> | <b>Case ascertainment</b>                             | <b>Method of detection</b>    |
| Abdurrahman, 1979 [1]           | Kaduna, Nigeria             | 1973-1974           | -                                                         | Enteric fever  | Review of hospital records                            | Blood, stool or urine culture |
| Afifi, 2005 [2]                 | Egypt                       | Mar 1999 - Oct 2003 | -                                                         | Typhoid fever  | Passive surveillance at hospitals                     | Blood culture or Widal test   |
| Ako, 2009 (1) [3]               | Douala, Cameroon            | 1995-2006           | -                                                         | Typhoid fever  | Review of hospital records                            | Not specified                 |
| Ako, 2009 (2) [3]               | Douala, Cameroon            | 1995-2006           | -                                                         | Typhoid fever  | Review of hospital records                            | Not specified                 |
| Ako, 2009 (3) [3]               | Douala, Cameroon            | 1995-2006           | -                                                         | Typhoid fever  | Review of hospital records                            | Not specified                 |
| Akullian, 2015 [4]              | Nairobi, Kenya              | 2010-2011           | -                                                         | Typhoid fever  | Passive surveillance at health clinic                 | Blood culture                 |
| Authur, 2015 [5]                | Sunyani, Ghana              | 2008-2011           | -                                                         | Typhoid fever  | Review of hospital records                            | Laboratory-confirmed          |
| Badaru, 2014 [6]                | Ejule, Nigeria              | 2011-2013           | -                                                         | Typhoid fever  | National or regional disease surveillance or records  | Not specified                 |
| Battikhi, 2003 [7]              | Jordan                      | 1995-1999           | 2.8                                                       | Enteric fever  | National or regional disease surveillance or records  | Stool culture                 |
| Breiman, 2012 [8]               | Kibera, Kenya               | Mar 2007 - Feb 2009 | 247.5                                                     | Typhoid fever  | Active population-based surveillance at health clinic | Blood culture                 |
| Dayot, 1967 [9]                 | Morocco                     | 1959-1962           | -                                                         | Enteric fever  | National or regional disease surveillance or records  | Blood culture                 |
| Hamze, 2004 [10]                | Tripoli, Libanon            | 1996-1999           | -                                                         | Typhoid fever  | Review of hospital records                            | Widal test                    |
| Hornus, 1934 (3) [11]           | Morocco                     | 1921-1930           | 13.6                                                      | Typhoid fever  | National or regional disease surveillance or records  | Not specified                 |
| Hornus, 1934 (4) [11]           | Levant region (Libanon)     | 1921-1930           | 13.9                                                      | Typhoid fever  | National or regional disease surveillance or records  | Not specified                 |
| Hornus, 1934 (5) [11]           | Tunesia & Algeria           | 1921-1930           | 3.08                                                      | Typhoid fever  | National or regional disease surveillance or records  | Not specified                 |

| <b>Author, year</b>                 | <b>City/Region, Country</b> | <b>Time period</b>  | <b>Incidence (annual average, per 100,000 population)</b> | <b>Disease</b> | <b>Case ascertainment</b>                            | <b>Method of detection</b>                  |
|-------------------------------------|-----------------------------|---------------------|-----------------------------------------------------------|----------------|------------------------------------------------------|---------------------------------------------|
| Kligler, 1933 (4) [12]              | Israel and Palestine        | 1923-1931           | -                                                         | Typhoid fever  | Review of hospital records                           | Not specified                               |
| Naji-Rammal, 2010 [13]              | Libanon                     | 2000-2008           | -                                                         | Enteric fever  | National or regional disease surveillance or records | Blood, bone marrow or stool culture         |
| Papa, 1970 [14]                     | El Oued, Algeria            | Oct 1965 - Aug 1970 | -                                                         | Enteric fever  | Passive surveillance at health clinics               | Blood culture                               |
| Pitzer, 2015 & Feasey, 2015 [15,16] | Blantyre, Malawi            | Jan 2011 - Feb 2015 | 115.4                                                     | Typhoid fever  | Passive surveillance at hospital                     | Blood culture                               |
| Valmary, 1979 [17]                  | Antananarivo, Madagascar    | 1976-1978           | -                                                         | Typhoid fever  | Review of hospital records                           | Blood or stool culture                      |
| Wicks, 1971 [18]                    | Harare, Zimbabwe            | 1966-1969           | -                                                         | Typhoid fever  | Review of hospital records                           | Widal test, during operation or post-mortem |
| <b>Asia</b>                         |                             |                     |                                                           |                |                                                      |                                             |
| Abucejo, 2001 [19]                  | Bohol, Philippines          | Apr 1994 - Dec 1997 | 45                                                        | Typhoid fever  | Review of hospital records                           | Blood culture                               |
| Dewan, 2013 [20]                    | Dhaka, Bangladesh           | 2005-2009           | 10                                                        | Typhoid fever  | Review of hospital records                           | Blood culture or Widal test                 |
| Das, 2013 [21]                      | Dhaka, Bangladesh           | 1993-2012           | -                                                         | Enteric fever  | Review of hospital records                           | Stool culture                               |
| Hernando, 1937 [22]                 | Manilla, Phillippines       | 1915-1935           | 154.5                                                     | Typhoid fever  | National or regional disease surveillance or records | Not specified                               |
| Kanungo, 2008 [23]                  | Kolkata, India              | May 2003 - Aug 2006 | -                                                         | Typhoid fever  | Passive surveillance in health centres and hospitals | Blood culture                               |
| Karkey, 2010 [24]                   | Kathmandu, Nepal            | 1993-2011           | 59                                                        | Typhoid fever  | Review of hospital records                           | Blood culture                               |
| Koh, 1976 [25]                      | Singapore                   | 1970-1974           | 9.32                                                      | Enteric fever  | National or regional disease surveillance or records | Blood culture                               |
| Liu, 2012 [26]                      | Linyi, China                | 1956-2011           | 2.5                                                       | Enteric fever  | National or regional disease surveillance or records | Not specified                               |
| Mathur, 1971 [27]                   | Jaipur, India               | 1960-1969           | 46.8                                                      | Enteric fever  | Review of hospital records                           | Blood culture                               |

| <b>Author, year</b>       | <b>City/Region, Country</b>                                          | <b>Time period</b>  | <b>Incidence (annual average, per 100,000 population)</b> | <b>Disease</b> | <b>Case ascertainment</b>                                                                                                                         | <b>Method of detection</b>           |
|---------------------------|----------------------------------------------------------------------|---------------------|-----------------------------------------------------------|----------------|---------------------------------------------------------------------------------------------------------------------------------------------------|--------------------------------------|
| Pan, 2012 [28]            | Henan province, China                                                | 2004-2011           | 0.15                                                      | Typhoid fever  | National or regional disease surveillance or records                                                                                              | Not specified                        |
| Patnaik, 1967 [29]        | New Delhi, India                                                     | 1955-1963           | -                                                         | Typhoid fever  | Review of hospital records                                                                                                                        | Not specified                        |
| Punjabi, 2013 [30]        | Jakarta, Indonesia                                                   | Aug 2001 - Jul 2003 | 140                                                       | Typhoid fever  | Passive surveillance at health centres                                                                                                            | Blood culture                        |
| Farrar (unpublished data) | Vietnam                                                              | 1977-1993           | -                                                         | Typhoid fever  | Review of hospital records                                                                                                                        | Clinical suspicion and blood culture |
| Qu, 2011 [31]             | Guangzhou, Shenzhen, and Foushan cities in Guangdong province, China | 2008-2010           | -                                                         | Typhoid fever  | National or regional disease surveillance or records                                                                                              | Not specified                        |
| Saha, 2001 [32]           | Dhaka, Bangladesh                                                    | May 1997 - Nov 1999 | -                                                         | Typhoid fever  | Self-referred patients at a diagnostic facility and patients referred to the facility by hospitals, health centres, or community-based physicians | Blood culture                        |
| Siddiqui, 2006 [33]       | Karachi, Pakistan                                                    | Jun 1999 - Dec 2001 | -                                                         | Enteric fever  | Patients referred to hospital after occurrence of febrile episode lasting >72h, which was ascertained by fortnightly visits to the households     | Blood culture or Typhidot test       |
| Tong, 2009 [34]           | Lin'An, Zhejiang province, China                                     | 2002-2008           | 29.4                                                      | Enteric fever  | National or regional disease surveillance or records                                                                                              | Not specified                        |
| Walia, 2005 [35]          | New Dehli, India                                                     | 2001-2003           | 980                                                       | Enteric fever  | Review of hospital records                                                                                                                        | Blood culture                        |
| Wang, 2013 [36]           | Hongta, China                                                        | 2006-2009           | 26.83                                                     | Enteric fever  | National or regional disease surveillance or records                                                                                              | Blood or stool culture               |
| Wang, 2014 [37]           | Guangxi, China                                                       | 2010-2013           | 6.29                                                      | Typhoid fever  | National or regional disease surveillance or records                                                                                              | Urine or stool culture or Widal test |

| <b>Author, year</b>      | <b>City/Region, Country</b>            | <b>Time period</b> | <b>Incidence (annual average, per 100,000 population)</b> | <b>Disease</b> | <b>Case ascertainment</b>                            | <b>Method of detection</b>           |
|--------------------------|----------------------------------------|--------------------|-----------------------------------------------------------|----------------|------------------------------------------------------|--------------------------------------|
| Wang, 2008 [38]          | Yuxi, Yunnan province, China           | 1999-2006          | 130                                                       | Enteric fever  | National or regional disease surveillance or records | Not specified                        |
| Xu, 2009 [39]            | Nanning city, Guangxi province, China  | 2004-2007          | 0.82                                                      | Typhoid fever  | National or regional disease surveillance or records | Not specified                        |
| Yang, 2004 [40]          | 22 counties in Guangxi Province, China | 1994-2002          | -                                                         | Typhoid fever  | National or regional disease surveillance or records | Urine or stool culture or Widal test |
| Yao, 2014 [41]           | Pingba county, Guizhou Province, China | 2005-2008          | 51.26                                                     | Enteric fever  | National or regional disease surveillance or records | Not specified                        |
| <b>Europe</b>            |                                        |                    |                                                           |                |                                                      |                                      |
| Brandis, 1962 [42]       | Hildesheim, Germany                    | 1946-1960          | 14.1                                                      | Typhoid fever  | National or regional disease surveillance or records | Blood culture                        |
| Camporese, 1960 (1) [43] | Grosseto province, Italy               | 1942 - 1949        | 105                                                       | Typhoid fever  | National or regional disease surveillance or records | Not specified                        |
| Camporese, 1960 (2) [43] | Grosseto province, Italy               | 1950- 1957         | 20.6                                                      | Typhoid fever  | National or regional disease surveillance or records | Not specified                        |
| Capasso, 1980 [44]       | Bari, Italy                            | 1955-1978          | -                                                         | Enteric fever  | National or regional disease surveillance or records | Not specified                        |
| Cominelli, 1971 [45]     | Italy                                  | 1966-1967          | -                                                         | Typhoid fever  | National or regional disease surveillance or records | Not specified                        |
| Hornus, 1934 (1) [11]    | France                                 | 1921-1930          | 12.4                                                      | Typhoid fever  | National or regional disease surveillance or records | Not specified                        |
| Hornus, 1934 (2) [11]    | Rhine region, France                   | 1921-1929          | 3.4                                                       | Typhoid fever  | National or regional disease surveillance or records | Not specified                        |
| Kligler, 1933 (1) [12]   | England                                | 1927-1929          | -                                                         | Enteric fever  | Review of hospital records                           | Not specified                        |
| Kligler, 1933 (2) [12]   | Germany                                | 1927-1929          | -                                                         | Enteric fever  | Review of hospital records                           | Not specified                        |
| Kligler, 1933 (3) [12]   | Italy                                  | 1927-1929          | -                                                         | Enteric fever  | Review of hospital records                           | Not specified                        |

| <b>Author, year</b>     | <b>City/Region, Country</b> | <b>Time period</b> | <b>Incidence (annual average, per 100,000 population)</b> | <b>Disease</b> | <b>Case ascertainment</b>                            | <b>Method of detection</b> |
|-------------------------|-----------------------------|--------------------|-----------------------------------------------------------|----------------|------------------------------------------------------|----------------------------|
| Moscato, 1976 (1) [46]  | Italy                       | 1955-1957          | 46.1                                                      | Enteric fever  | National or regional disease surveillance or records | Not specified              |
| Moscato, 1976 (2) [46]  | Italy                       | 1963-1965          | 25.1                                                      | Enteric fever  | National or regional disease surveillance or records | Not specified              |
| Moscato, 1976 (3) [46]  | Italy                       | 1969-1971          | 22.5                                                      | Enteric fever  | National or regional disease surveillance or records | Not specified              |
| Moscato, 1976 (4) [46]  | Emilia Romagna, Italy       | 1955-1957          | 18.3                                                      | Enteric fever  | National or regional disease surveillance or records | Not specified              |
| Moscato, 1976 (5) [46]  | Emilia Romagna, Italy       | 1963-1965          | 7.8                                                       | Enteric fever  | National or regional disease surveillance or records | Not specified              |
| Moscato, 1976 (6) [46]  | Emilia Romagna, Italy       | 1969-1971          | 6.8                                                       | Enteric fever  | National or regional disease surveillance or records | Not specified              |
| Moscato, 1976 (7) [46]  | Liguria, Italy              | 1955-1957          | 31.2                                                      | Enteric fever  | National or regional disease surveillance or records | Not specified              |
| Moscato, 1976 (8) [46]  | Liguria, Italy              | 1963-1965          | 19.1                                                      | Enteric fever  | National or regional disease surveillance or records | Not specified              |
| Moscato, 1976 (9) [46]  | Liguria, Italy              | 1969-1971          | 16.8                                                      | Enteric fever  | National or regional disease surveillance or records | Not specified              |
| Moscato, 1976 (10) [46] | Lazio, Italy                | 1955-1957          | 42.7                                                      | Enteric fever  | National or regional disease surveillance or records | Not specified              |
| Moscato, 1976 (11) [46] | Lazio, Italy                | 1963-1965          | 19.9                                                      | Enteric fever  | National or regional disease surveillance or records | Not specified              |
| Moscato, 1976 (12) [46] | Lazio, Italy                | 1969-1971          | 18.8                                                      | Enteric fever  | National or regional disease surveillance or records | Not specified              |
| Moscato, 1976 (13) [46] | Tuscany, Italy              | 1955-1957          | 19.4                                                      | Enteric fever  | National or regional disease surveillance or records | Not specified              |

| <b>Author, year</b>     | <b>City/Region, Country</b> | <b>Time period</b> | <b>Incidence (annual average, per 100,000 population)</b> | <b>Disease</b> | <b>Case ascertainment</b>                            | <b>Method of detection</b> |
|-------------------------|-----------------------------|--------------------|-----------------------------------------------------------|----------------|------------------------------------------------------|----------------------------|
| Moscato, 1976 (14) [46] | Tuscany, Italy              | 1963-1965          | 12.2                                                      | Enteric fever  | National or regional disease surveillance or records | Not specified              |
| Moscato, 1976 (15) [46] | Tuscany, Italy              | 1969-1971          | 9.6                                                       | Enteric fever  | National or regional disease surveillance or records | Not specified              |
| Moscato, 1976 (16) [46] | Sardinia, Italy             | 1955-1957          | 94.1                                                      | Enteric fever  | National or regional disease surveillance or records | Not specified              |
| Moscato, 1976 (17) [46] | Sardinia, Italy             | 1963-1965          | 40                                                        | Enteric fever  | National or regional disease surveillance or records | Not specified              |
| Moscato, 1976 (18) [46] | Sardinia, Italy             | 1969-1971          | 38.4                                                      | Enteric fever  | National or regional disease surveillance or records | Not specified              |
| Moscato, 1976 (19) [46] | Sicily, Italy               | 1955-1957          | 65.2                                                      | Enteric fever  | National or regional disease surveillance or records | Not specified              |
| Moscato, 1976 (20) [46] | Sicily, Italy               | 1963-1965          | 31.9                                                      | Enteric fever  | National or regional disease surveillance or records | Not specified              |
| Moscato, 1976 (21) [46] | Sicily, Italy               | 1969-1971          | 28.6                                                      | Enteric fever  | National or regional disease surveillance or records | Not specified              |
| Moscato, 1976 (22) [46] | Campania, Italy             | 1955-1957          | 59.6                                                      | Enteric fever  | National or regional disease surveillance or records | Not specified              |
| Moscato, 1976 (23) [46] | Campania, Italy             | 1963-1965          | 33.9                                                      | Enteric fever  | National or regional disease surveillance or records | Not specified              |
| Moscato, 1976 (24) [46] | Campania, Italy             | 1969-1971          | 52.5                                                      | Enteric fever  | National or regional disease surveillance or records | Not specified              |
| Moscato, 1976 (25) [46] | Apulia, Italy               | 1955-1957          | 172                                                       | Enteric fever  | National or regional disease surveillance or records | Not specified              |
| Moscato, 1976 (26) [46] | Apulia, Italy               | 1963-1965          | 112.4                                                     | Enteric fever  | National or regional disease surveillance or records | Not specified              |

| <b>Author, year</b>     | <b>City/Region, Country</b> | <b>Time period</b> | <b>Incidence (annual average, per 100,000 population)</b> | <b>Disease</b> | <b>Case ascertainment</b>                            | <b>Method of detection</b> |
|-------------------------|-----------------------------|--------------------|-----------------------------------------------------------|----------------|------------------------------------------------------|----------------------------|
| Moscato, 1976 (27) [46] | Apulia, Italy               | 1969-1971          | 77.8                                                      | Enteric fever  | National or regional disease surveillance or records | Not specified              |
| Moscato, 1976 (28) [46] | Basilicata, Italy           | 1955-1957          | 85.9                                                      | Enteric fever  | National or regional disease surveillance or records | Not specified              |
| Moscato, 1976 (29) [46] | Basilicata, Italy           | 1963-1965          | 81.3                                                      | Enteric fever  | National or regional disease surveillance or records | Not specified              |
| Moscato, 1976 (30) [46] | Basilicata, Italy           | 1969-1971          | 70.2                                                      | Enteric fever  | National or regional disease surveillance or records | Not specified              |
| Moscato, 1976 (31) [46] | Calabria, Italy             | 1955-1957          | 38.3                                                      | Enteric fever  | National or regional disease surveillance or records | Not specified              |
| Moscato, 1976 (32) [46] | Calabria, Italy             | 1963-1965          | 17.8                                                      | Enteric fever  | National or regional disease surveillance or records | Not specified              |
| Moscato, 1976 (33) [46] | Calabria, Italy             | 1969-1971          | 10.9                                                      | Enteric fever  | National or regional disease surveillance or records | Not specified              |
| Moscato, 1976 (34) [46] | Lombardy, Italy             | 1955-1957          | 20.6                                                      | Enteric fever  | National or regional disease surveillance or records | Not specified              |
| Moscato, 1976 (35) [46] | Lombardy, Italy             | 1963-1965          | 10.4                                                      | Enteric fever  | National or regional disease surveillance or records | Not specified              |
| Moscato, 1976 (36) [46] | Lombardy, Italy             | 1969-1971          | 10                                                        | Enteric fever  | National or regional disease surveillance or records | Not specified              |
| Moscato, 1976 (37) [46] | Piedmont, Italy             | 1955-1957          | 13.6                                                      | Enteric fever  | National or regional disease surveillance or records | Not specified              |
| Moscato, 1976 (38) [46] | Piedmont, Italy             | 1963-1965          | 7.5                                                       | Enteric fever  | National or regional disease surveillance or records | Not specified              |
| Moscato, 1976 (39) [46] | Piedmont, Italy             | 1969-1971          | 9.8                                                       | Enteric fever  | National or regional disease surveillance or records | Not specified              |



| <b>Author, year</b>         | <b>City/Region, Country</b> | <b>Time period</b> | <b>Incidence (annual average, per 100,000 population)</b> | <b>Disease</b> | <b>Case ascertainment</b>                            | <b>Method of detection</b> |
|-----------------------------|-----------------------------|--------------------|-----------------------------------------------------------|----------------|------------------------------------------------------|----------------------------|
| Moscato, 1976 (40) [46]     | Veneto, Italy               | 1955-1957          | 26.5                                                      | Enteric fever  | National or regional disease surveillance or records | Not specified              |
| Moscato, 1976 (41) [46]     | Veneto, Italy               | 1963-1965          | 13.6                                                      | Enteric fever  | National or regional disease surveillance or records | Not specified              |
| Moscato, 1976 (42) [46]     | Veneto, Italy               | 1969-1971          | 11.9                                                      | Enteric fever  | National or regional disease surveillance or records | Not specified              |
| Muller-Voigt, 1956 (1) [47] | Duisburg, Germany           | 1945-1950          | -                                                         | Typhoid fever  | National or regional disease surveillance or records | Not specified              |
| Muller-Voigt, 1956 (2) [47] | Düsseldorf, Germany         | 1945-1946          | -                                                         | Typhoid fever  | National or regional disease surveillance or records | Not specified              |
| Muller-Voigt, 1956 (3) [47] | Oberhausen, Germany         | 1945-1946          | -                                                         | Typhoid fever  | National or regional disease surveillance or records | Not specified              |
| Paquet, 1931 [48]           | Oise region, France         | 1911-1930          | -                                                         | Typhoid fever  | National or regional disease surveillance or records | Not specified              |
| Perari, 1958 [49]           | Perugia, Italy              | 1939-1954          | 158.4                                                     | Enteric fever  | National or regional disease surveillance or records | Blood culture              |
| Stoll, 1949 [50]            | Budapest, Hungary           | 1950-1956          | 10.5                                                      | Typhoid fever  | National or regional disease surveillance or records | Not specified              |
| Stoppani, 1958 [51]         | Perugia, Italy              | 1939-1955          | 67                                                        | Typhoid fever  | National or regional disease surveillance or records | Not specified              |
| Torelli, 1956 [52]          | Trani, Italy                | 1939-1953          | 170                                                       | Typhoid fever  | National or regional disease surveillance or records | Not specified              |
| Trompeo, 1950 [53]          | Turin, Italy                | 1945-1949          | 244                                                       | Enteric fever  | National or regional disease surveillance or records | Not specified              |
| von der Forst, 1929 [54]    | Münster, Germany            | 1925-1931          | -                                                         | Typhoid fever  | National or regional disease surveillance or records | Not specified              |

| <b>Author, year</b>             | <b>City/Region, Country</b>                                                                          | <b>Time period</b>          | <b>Incidence (annual average, per 100,000 population)</b> | <b>Disease</b> | <b>Case ascertainment</b>                            | <b>Method of detection</b>   |
|---------------------------------|------------------------------------------------------------------------------------------------------|-----------------------------|-----------------------------------------------------------|----------------|------------------------------------------------------|------------------------------|
| Weinfurter, 1972 [55]           | Niederosterreich, Lower Austria region, Austria                                                      | January 1922 - October 1926 | -                                                         | Typhoid fever  | National or regional disease surveillance or records | Stool culture and Widal test |
| <b>North- and South-America</b> |                                                                                                      |                             |                                                           |                |                                                      |                              |
| <b>Author, year</b>             | <b>City/Region, Country</b>                                                                          | <b>Time period</b>          | <b>Incidence (annual average, per 100,000 population)</b> | <b>Disease</b> | <b>Case ascertainment</b>                            | <b>Method of detection</b>   |
| Falk, 1926 [56]                 | Chicago, USA                                                                                         | 1912-1925                   | -                                                         | Typhoid fever  | National or regional disease surveillance or records | Not specified                |
| Harmon, 1930 (1) [57]           | Northern States (Connecticut, Michigan, Minnesota, New York and Wisconsin), United States of America | 1915-1928                   | -                                                         | Typhoid fever  | National or regional disease surveillance or records | Not specified                |
| Harmon, 1930 (2) [57]           | Southern States (Alabama, Louisiana, Mississippi), United States of America                          | 1915-1928                   | -                                                         | Typhoid fever  | National or regional disease surveillance or records | Not specified                |
| Shuval, 1993 (1) [58]           | Santiago, Chile                                                                                      | 1973-1986                   | 156.2                                                     | Typhoid fever  | National or regional disease surveillance or records | Not specified                |
| Shuval, 1993 (2) [58]           | Chile                                                                                                | 1973-1986                   | 64.8                                                      | Typhoid fever  | National or regional disease surveillance or records | Not specified                |

## References

- [1] Abdurrahman MB, Joss D V. Pattern of enteric fever in Kaduna, Nigeria. *Niger Med J* 1979;9:437–41.
- [2] Afifi S, Earhart K, Azab MA, Youssef FG, El Sakka H, Wasfy M, et al. Hospital-based surveillance for acute febrile illness in Egypt: a focus on community-acquired bloodstream infections. *Am J Trop Med Hyg* 2005;73:392–9.
- [3] Ako AA, Nkeng GE, Takem GEE. Water quality and occurrence of water-borne diseases in the Douala 4th District, Cameroon. *Water Sci Technol* 2009;59:2321–9. doi:10.2166/wst.2009.268.
- [4] Akullian A, Ng'eno E, Matheson AI, Cosmas L, Macharia D, Fields B, et al. Environmental Transmission of Typhoid Fever in an Urban Slum. *PLoS Negl Trop Dis* 2015;9:e0004212. doi:10.1371/journal.pntd.0004212.
- [5] Authur JL, Gyasi SF, Kabo-Bah AT, Awuah E. Rainfall variability and its impact on reported OPD cases of *Salmonella typhi* infections in Sunyani, Ghana. *Res J Environ Sci* 2015;9:39–47.
- [6] Badaru YU, Olayemi IK, Spencer O, Yakubu M. Assessment of a vulnerable rural community to typhoid fever using geospatial-temporal analysis: case study of Ejule, Kogi state of Nigeria. *J Environ Earth Sci* 2014;4:100–8.
- [7] Battikhi MNG. Occurrence of *Salmonella typhi* and *Salmonella paratyphi* in Jordan. *New Microbiol* 2003;26:363–73.
- [8] Breiman RF, Cosmas L, Njuguna H, Audi A, Olack B, Ochieng JB, et al. Population-based incidence of typhoid fever in an urban informal settlement and a rural area in Kenya: Implications for typhoid vaccine use in Africa. *PLoS One* 2012;7. doi:10.1371/journal.pone.0029119.
- [9] Dayot G, Nejmi S, Carraz M. Study of the epidemiology of Moroccan fevers. *Rev Hyg Med Soc* 1967;15:108–23.
- [10] Hamze M, Vincent P. Typhoid fever in north Lebanon: a 8-year study (1992-1999) using the Widal test. *East Mediterr Heal J* 2004;10:180–6.
- [11] Hornus G. Influence of Season on Epidemic Variations of Typhoid. *Rev d'Hygiene Med Prev* 1934;56:332–47.
- [12] Kligler IJ, Olitzki L. The Epidemicity and Seasonal Prevalence of Infectious Diseases in Palestine. *Folia Med Intern Orient* 1933;1:169–94.
- [13] Naji-Rammal S, Bedrossian N. Typhoid fever in Lebanon: epidemiological study. *Sante n.d.*;20:81–6. doi:10.1684/san.2010.0197.
- [14] Papa F, Peyron R. A L'étude des *Salmonella* en Algérie 1970.
- [15] Pitzer VE, Feasey NA, Msefula C, Mallewa J, Kennedy N, Dube Q, et al. Mathematical modeling to assess the drivers of the recent emergence of typhoid fever in Blantyre, Malawi. *Clin Infect Dis* 2015;61:S251–8. doi:10.1093/cid/civ710.
- [16] Feasey NA, Gaskell K, Wong V, Msefula C, Selemani G, Kumwenda S, et al. Rapid Emergence of Multidrug Resistant, H58-Lineage *Salmonella Typhi* in Blantyre, Malawi. *PLoS Negl Trop Dis* 2015;9:1–13. doi:10.1371/journal.pntd.0003748.
- [17] Valmary J, Capdevielle P, Thonnier C, Coign, Ard A. La Fievre Typhoide a Tananarive. *Med Trop* 1979;39:405–14.
- [18] Wicks A, Holmes G, Davidson L. Endemic typhoid fever. *Q J Med* 1971;159:149–54.
- [19] Abucejo PE, Capeding MR, Lupisan SP, Arcay J, Sombrero LT, Ruutu P, et al. Blood culture confirmed typhoid fever in a provincial hospital in the Philippines. *Southeast Asian J Trop Med Public Health* 2001;32:531–6.
- [20] Dewan AM, Corner R, Hashizume M, Ongee ET. Typhoid Fever and Its Association with Environmental Factors in the Dhaka Metropolitan Area of Bangladesh: A Spatial and Time-Series Approach. *PLoS Negl Trop Dis* 2013;7:12–5. doi:10.1371/journal.pntd.0001998.
- [21] Das SK, Chisti MJ, Malek MA, Shahnawaz A, Farzana FD, Farzana F, et al. Socio-demographic, host and clinical characteristics of people with typhoidal and non-typhoidal *Salmonella* gastroenteritis in urban Bangladesh. *J Biomed Sci Eng* 2013;6:834–42.
- [22] Hernando E, Alomia A. Prevalence of Typhoid Fever in the City of Manila. *Mon Bull Bur Heal* 1937;17:79–109.

- [23] Kanungo S, Dutta S, Sur D. Epidemiology of typhoid and paratyphoid fever in India. *J Infect Dev Ctries* 2008;2:454–60.
- [24] Karkey A, Arjyal A, Anders KL, Boni MF, Dongol S, Koirala S, et al. The burden and characteristics of enteric fever at a healthcare facility in a densely populated area of Kathmandu. *PLoS One* 2010;5. doi:10.1371/journal.pone.0013988.
- [25] Koh TS, Goh KT. Enteric fever surveillance in Singapore. *Singapore Med J* 1976;17:32–7.
- [26] Liu RT. Control counter-measures for eliminating epidemic periodicity of typhoid fever and paratyphoid fever in Linyi City. *Occup Heal* 2012;28:2273–5.
- [27] Mathur GM, Sharma R. A study of typhoid fever in Jaipur, India. *Trop Geogr Med* 1971;23:329–34.
- [28] Pan JJ, Xie ZQ, Kang K, Mu Y iao, Chen HM. Epidemiological characteristics of typhoid in Henan in 2004-2011. *Chinese Prev Med* 2012;13:767–9.
- [29] Patnaik KC, Kapoor PN. A note on incidence of typhoid in Delhi. *Indian J Med Res* 1967;55:228–39.
- [30] Punjabi NH, Agtini MD, Ochiai RL, Simanjuntak CH, Lesmana M, Subekti D, et al. Enteric fever burden in North Jakarta, Indonesia: a prospective, community-based study. *J Infect Dev Ctries* 2013;7:781–7.
- [31] Qu Y Bin, Dai CF, Zhang JP. Correlation between water-borne diseases and qualified rate of total number of bacterial colonies in terminal tap water, Guangdong province. *J Environ Heal* 2011;28:1093–6.
- [32] Saha SK, Baqui AH, Hanif M, Darmstadt GL, Ruhulamin M, Nagatake T, et al. Typhoid fever in Bangladesh: implications for vaccination policy. *Pediatr Infect Dis J* 2001;20:521–4.
- [33] Siddiqui FJ, Rabbani F, Hasan R, Nizami SQ, Bhutta ZA. Typhoid fever in children: some epidemiological considerations from Karachi, Pakistan. *Int J Infect Dis* 2006;10:215–22. doi:10.1016/j.ijid.2005.03.010.
- [34] Tong WS, Shan YM. Epidemiological feature of typhoid -paratyphoid fevers in Lin'an, Zhejiang province, 2002-2008. *Dis Surveill* 2009;24:349–51.
- [35] Walia M, Gaiind R, Mehta R, Paul P, Aggarwal P, Kalaivani M. Current perspectives of enteric fever: a hospital-based study from India. *Ann Trop Paediatr* 2005;25:161–74. doi:10.1179/146532805X58085.
- [36] Wang JF, Wang Y, Zhang J, Christakos G, Sun JL, Liu X, et al. Spatiotemporal Transmission and Determinants of Typhoid and Paratyphoid Fever in Hongta District, Yunnan Province, China. *PLoS Negl Trop Dis* 2013;7:1–9. doi:10.1371/journal.pntd.0002112.
- [37] Wang M, Kan B, Yang J, Lin M, Yan M, Zeng J, et al. Epidemiological characteristics of typhoid fever and antibiotic susceptibility testing of *Salmonella* Typhi isolates in Guangxi, 1994-2013. *Chinese J Epidemiol* 2014;35:930–4.
- [38] Wang SY, Li K, Li XM. Epidemiological analysis of typhoid and paratyphoid in Hongta district of Yuxi city from 1999 to 2006. *Dis Surveill* 2008;23:415–6.
- [39] Xu B, Huang X, Tang L. Analysis on epidemic characteristics of typhoid and paratyphoid fever in Nanning City in 2004-2007. *China Trop Med* 2009;9:516–7.
- [40] Yang J, Dong BQ, Wang ML. Analysis of prevalent status of paratyphoid A and typhoid in Guangxi Autonomous Region in 1994-2002. *China Trop Med* 2004;4:177–8.
- [41] Yao GH, Tang GP, Chen X, Tian KC, Zhang J, Sun JL, et al. Research on epidemiological features and risk factors of typhoid and paratyphoid fever in Pingba County, Guizhou Province. *Mod Prev Med* 2014;41:385–7.
- [42] Brandis H, Walden M. The presence of typhoid and paratyphoid B in an administrative area from 1946 to 1960. *Z Immun Exp Ther* 1962;123:412–23.
- [43] Camporese F, Martin Wedard A. Endemicity of Typhoid and Para-typhoid in Grosseto Province, 1942-57. *Ig Sanita Pubbl* 1960;16:159–203.
- [44] Capasso V, Grosso E, Serio G. Mathematical models in epidemiological analysis. II. Typhoid fever: time series analysis. *Ann Sclavo n.d.*;22:189–206.
- [45] Cominelli A. The course of typhoid and paratyphoid in recent years. *Ann Sanita Pubblica* 1971;32:357–61.
- [46] Moscato V, Salvo S. The evolution of typhoid and paratyphoid in Italy. Some observations on the incidence by month of reported cases in the various regions. *G Mal Infett Parassit* 1976;28:635–44.
- [47] Muller-Voigt F. A so far unknown typhoid epidemic of 1945-46 and its effects during the following

- decade; epidemiological, hygienic and public health aspects. *Offentl Gesundheitsdienst* 1956;18:43–51.
- [48] Paquet. Seasons and Rainfall and Infective Disease. *Rev d'Hyg Med Prev* 1931;53:401–22.
- [49] Perari D. Survey of typhoid-para-typhoid infections within the municipal territory of Perugia during the period 1939-1954. *Ann Sanita Pubblica n.d.*;19:623–41.
- [50] Stoll K. Typhoid fever epidemiology in Budapest. *Nepegeszsegegy* 1949;38:193–205.
- [51] Stoppani A. The Incidence of Typhoid and Paratyphoid in Perugia Province in the Last 17 Years. *G Mal Infett Parassit* 1958;10:914–23.
- [52] Torelli F. Observations on the Endemicity of Typhoid Fever in Trani in the 15 Years 1939-1953. *G Mal Infett Parassit* 1956;8:24–8.
- [53] Trompeo G, Giacomasso P. Seasonal Recurrence of Enteric Fevers in Turin. *G Accad Med Torino* 1950;113:9–14.
- [54] von der Forst P. The Incidence of Typhoid and Paratyphoid Fever, Dysentery and Food Poisoning in the Munster Area of Westphalia, 1925-31. *Arch F Hyg U Bakt* 1932;109:85–107.
- [55] Weinfurter F. Typhoid Fever in Lower Austria in the Period after the War. *Seuchenbekämpfung* 1927;4:131–9.
- [56] Falk I. The Fatality of Typhoid Fever in Chicago. *J Prev Med* 1926;1:53–69.
- [57] Harmon GE. Seasonal Distribution of Typhoid Fever-Southern and Northern States. *Am J Public Health Nations Health* 1930;20:395–402.
- [58] Shuval HI. Investigation of typhoid fever and cholera transmission by raw wastewater irrigation in Santiago, Chile. *Water Sci Technol* 1993;27:167–74.

**Supplementary Table 3. Comparison of typhoid and paratyphoid datasets.**

| <b>Author, year</b>      | <b>City/Region, Country</b>                                                   | <b>Time period</b>  | <b>Typhoid incidence<br/>(annual average, per<br/>100,000 population)</b> | <b>Paratyphoid incidence<br/>(annual average, per<br/>100,000 population)</b> | <b>Region</b>        |
|--------------------------|-------------------------------------------------------------------------------|---------------------|---------------------------------------------------------------------------|-------------------------------------------------------------------------------|----------------------|
| Brandis, 1962 [1]        | Hildesheim, Germany                                                           | 1946-1960           | 14.1                                                                      | 7.0                                                                           | Europe               |
| Camporese, 1960 (1) [2]  | Grosseto province, Italy                                                      | 1942 - 1949         | 105                                                                       | 19.6                                                                          | Europe               |
| Camporese, 1960 (2) [2]  | Grosseto province, Italy                                                      | 1950- 1957          | 20.6                                                                      | 9.8                                                                           | Europe               |
| Cominelli, 1971 [3]      | Italy                                                                         | 1966-1967           | -                                                                         | -                                                                             | Europe               |
| Kanungo, 2008 [4]        | Kolkata, India                                                                | May 2003 - Aug 2006 | -                                                                         | -                                                                             | Asia                 |
| Karkey, 2010 [5]         | Kathmandu, Nepal                                                              | 1993-2011           | 59                                                                        | 23                                                                            | Asia                 |
| Kligler, 1933 [6]        | Israel and Palestine                                                          | 1923-1931           | -                                                                         | -                                                                             | Africa & Middle East |
| Punjabi, 2013 [7]        | Jakarta, Indonesia                                                            | Aug 2001 - Jul 2003 | 140                                                                       | 50                                                                            | Asia                 |
| Qu, 2011 [8]             | Guangzhou, Shenzhen, and<br>Foushan cities in<br>Guangdong province,<br>China | 2008-2010           | -                                                                         | -                                                                             | Asia                 |
| Stoppani, 1958 [9]       | Perugia, Italy                                                                | 1939-1955           | 67                                                                        | 17                                                                            | Europe               |
| von der Forst, 1929 [10] | Münster, Germany                                                              | 1925-1931           | -                                                                         | -                                                                             | Europe               |
| Xu, 2009 [11]            | Nanning city, Guangxi<br>province, China                                      | 2004-2007           | 0.82                                                                      | 0.44                                                                          | Asia                 |
| Yang, 2004 [12]          | 22 counties in Guangxi<br>Province, China                                     | 1994-2002           | -                                                                         | -                                                                             | Asia                 |

## References

- [1] Brandis H, Walden M. The presence of typhoid and paratyphoid B in an administrative area from 1946 to 1960. *Z Immun Exp Ther* 1962;123:412–23.
- [2] Camporese F, Martin Wedard A. Endemicity of Typhoid and Para-typhoid in Grosseto Province, 1942-57. *Ig Sanita Pubbl* 1960;16:159–203.
- [3] Cominelli A. The course of typhoid and paratyphoid in recent years. *Ann Sanita Pubblica* 1971;32:357–61.
- [4] Kanungo S, Dutta S, Sur D. Epidemiology of typhoid and paratyphoid fever in India. *J Infect Dev Ctries* 2008;2:454–60.
- [5] Karkey A, Arjyal A, Anders KL, Boni MF, Dongol S, Koirala S, et al. The burden and characteristics of enteric fever at a healthcare facility in a densely populated area of kathmandu. *PLoS One* 2010;5. doi:10.1371/journal.pone.0013988.
- [6] Kligler IJ, Olitzki L. The Epidemicity and Seasonal Prevalence of Infectious Diseases in Palestine. *Folia Med Intern Orient* 1933;1:169–94.
- [7] Punjabi NH, Agtini MD, Ochiai RL, Simanjuntak CH, Lesmana M, Subekti D, et al. Enteric fever burden in North Jakarta, Indonesia: a prospective, community-based study. *J Infect Dev Ctries* 2013;7:781–7.
- [8] Qu Y Bin, Dai CF, Zhang JP. Correlation between water-borne diseases and qualified rate of total number of bacterial colonies in terminal tap water, Guangdong province. *J Environ Heal* 2011;28:1093–6.
- [9] Stoppani A. The Incidence of Typhoid and Paratyphoid in Perugia Province in the Last 17 Years. *G Mal Infett Parassit* 1958;10:914–23.
- [10] von der Forst P. The Incidence of Typhoid and Paratyphoid Fever, Dysentery and Food Poisoning in the Munster Area of Westphalia, 1925-31. *Arch F Hyg U Bakt* 1932;109:85–107.
- [11] Xu B, Huang X, Tang L. Analysis on epidemic characteristics of typhoid and paratyphoid fever in Nanning City in 2004-2007. *China Trop Med* 2009;9:516–7.
- [12] Yang J, Dong BQ, Wang ML. Analysis of prevalent status of paratyphoid A and typhoid in Guangxi Autonomous Region in 1994-2002. *China Trop Med* 2004;4:177–8.
